# Supplementary material for: High-resolution predictions of ground ice content for the Northern Hemisphere permafrost region
Source: Copernicus journal article supplement (doi:10.5194/essd-2022-144), 2022-09-12
Supplement: Supplementary file 1 [file Supplementary_Data_1.xlsx]

## Sheet: Information
Column	Unit	Description
id		Identifier for individual 30 arc-second grid cells
x	decimal degrees	WGS 84 (EPSG:4326)
y	decimal degrees	WGS 84 (EPSG:4326)
site		Name of the borehole/transect site(s)
region		Location of the study site
country		Location of the study site
VIC	%VIC	Volumetric ice content, an average for a 30 arc-second grid cell
Transformation from GIC	sg/dbd/	The method of transformation from GIC to VIC whenever applied; sg for transformation with specific gravity method, dbd for dry bulk density-based method. Blank cell means the original data was provided as VIC.
GIC	%GIC	Gravimetric ice content, an average for a 30 arc-second grid cell
cores		Number of cores that were used to compute the average ice content for a grid cell
top	cm	Topmost sampling depth
bottom	cm	Lowest sampling depth
sample thickness	cm	Difference between lowest and topmost sampling depth. Repsentative sampling depth because sampling gaps occur between top and bottom.
soil material	M;MP;P	Classification of dominant soil materials; M = mostly mineral soil material (>90% of the length of the vertical borehole profile), MP = a mix of organic and mineral materials (i.e., less pronounced difference in associated material proportions), and P = mostly peat/organic layers (>90%).
reference		Source for ground ice content data (see Appendix E for full reference)

## Sheet: VIC n=437
id	x	y	site	region	country	VIC	Transformation from GIC	cores	top (cm)	bot (cm)	repsentative sample thickness (cm)	soil material	reference
1	-76.4675	56.5489	Umiujaq (FS)&VDT2	Quebec	Canada	42.4406		2	100	488	388	M	Calmels, F. and Allard, M. 2008
2	-76.2147	56.6106	Umiujaq (L1)	Quebec	Canada	63.6		1	200	675	475	M	Calmels, F. and Allard, M. 2008
3	-76.4625	56.8928	Umiujaq (L2)	Quebec	Canada	60.5		1	150	506	356	M	Calmels, F. and Allard, M. 2008
4	-76.2936	56.9164	Umiujaq (L3)	Quebec	Canada	51.6		1	150	537	387	M	Calmels, F. and Allard, M. 2008
5	-76.0903	56.6139	Umiujaq (P)	Quebec	Canada	46		1	150	537	387	M	Calmels, F. and Allard, M. 2008
6	-76.4103	56.8919	Umiujaq (PL1)	Quebec	Canada	32.9		1	150	477	327	M	Calmels, F. and Allard, M. 2008
7	-76.5494	56.9189	Umiujaq (PL2)	Quebec	Canada	39.1		1	150	384	234	M	Calmels, F. and Allard, M. 2008
8	-76.4825	56.5583	Umiujaq (SM)	Quebec	Canada	71		1	200	600	400	M	Calmels, F. and Allard, M. 2008
9	141.705	73.2866	Lyakhovskyi O.	Siberia	Russia	68.3099	sg	1	150	1200	1050	MP	Wetterich, S. et al., 2016
10	143.635	72.672	Oyogos yar	Siberia	Russia	79.4521	sg	1	450	900	450	MP	Wetterich, S. et al., 2016
11	148.155	70.6375	Boydom	NE Siberia	Russia	74		6	20	160	140	M	Iwahana, G. et al., 2014
12	148.264	70.5633	Kryvaya	NE Siberia	Russia	83		4	20	170	150	M	Iwahana, G. et al., 2014
13	147.469	70.2519	Verkhny Khatistakh	NE Siberia	Russia	75		5	15	155	140	M	Iwahana, G. et al., 2014
14	148.048	70.6358	Flood	NE Siberia	Russia	60		2	40	150	110	M	Iwahana, G. et al., 2014
15	147.304	70.5156	Allaikha	NE Siberia	Russia	86		1	60	90	30	M	Iwahana, G. et al., 2014
23	-150.871	69.5667	Itkillik	Alaska	Alaska	63.4175		3	35	520	485	M	Kanevskiy, M. et al., 2011
24	-156.706	71.2953	Barrow	Alaska	Alaska	59.5387	sg	1	15	450	435	M	Meyer, H. et al., 2010
25	-149.254	63.8784	Healy	Alaska	Alaska	65.6666		2	55	180	125	MP	Osterkamp, T. E. et al., 2009
26	-150.73	69.251	Arctic foothills AL2	Alaska	Alaska	73.0425	sg	6	40	400	360	MP	Trochim, E. D. et al., 2016
27	-150.975	69.3282	Arctic foothills AR6	Alaska	Alaska	77.6677	sg	2	50	200	150	MP	Trochim, E. D. et al., 2016
28	87.9383	49.871	Akkol valley	Altai	Russia	60		6	10	400	390	M	Iwahana, G. et al., 2012
29	126.265	70.3436	Kurungnakh (Lena delta)	Sakha Republic	Russia	64.191	sg	15	100	600	500	MP	Wetterich, S. et al., 2008
30	159.216	68.6291	Duvanny var (DY-04)	Sakha Republic	Russia	71.875	sg	1	30	360	330	M	Wetterich, S. et al., 2011
31	159.141	68.6307	Duvanny var (DY-05)	Sakha Republic	Russia	59.763	sg	1	130	630	500	M	Wetterich, S. et al., 2011
32	159.088	68.6328	Duvanny var (DY-01)	Sakha Republic	Russia	60.6256	sg	1	75	575	500	M	Wetterich, S. et al., 2011
33	-140.975	62.5542	Beaver Creek&BH12f&BH12&BH12B	Yukon	Canada	64.963		7	30	586	556	MP	Pumple, J. et al., 2015
35	-157.036	65.2556	Finger lake	Alaska	Alaska	79.1012		2	45	350	305	P	Kanevskiy, M. et al., 2014
37	-157.639	65.1972	Two lakes	Alaska	Alaska	76.8897		3	45	480	435	P	Kanevskiy, M. et al., 2014
39	-157.725	63.575	Innoko flats	Alaska	Alaska	72.2037		3	60	550	490	P	Kanevskiy, M. et al., 2014
40	-138.878	69.5755	Herschel Island	Yukon	Canada	68.7459	sg	5	30	165	135	M	Kokelj, S. V. et al., 2012
41	-134.585	69.4808	Richards Island	NW Territories	Canada	58.2367	sg	26	100	225	125	M	O’Neill, H. B. and Burn, C. R. 2012
42	172.219	67.4407	Elgygytgyn	Chukchi Peninsula	Russia	52.6316	sg	2	40	500	460	M	Schwamborn, G. et al., 2006
43	-156.59	71.3079	Barrow (ag)	Alaska	Alaska	81.2645	sg	4	28	113	85	M	Munroe, J. S. et al., 2007
44	-156.423	71.0733	Barrow (per)	Alaska	Alaska	80.4109	sg	5	22	105	83	M	Munroe, J. S. et al., 2007
45	-164.307	66.5828	Kit-1&PETA_CARB_ID19	Alaska	Alaska	42.6047	sg	2	150	650	500	M	Wetterich, S. et al., 2012
47	-148.897	65.5533	Dalton highway CD-4&AUTC-08-2---4	Alaska	Alaska	65.7948		4	71	550	479	M	Kanevskiy, M. et al., 2012
48	-148.894	65.5486	Dalton highway(section 2 ja 3)	Alaska	Alaska	68.9655	sg	13	50	1700	1650	M	Kanevskiy, M. et al., 2012
49	-148.876	65.5375	Dalton highway(section 4)	Alaska	Alaska	63.6364	sg	15	50	400	350	M	Kanevskiy, M. et al., 2012
50	-140.415	69.588	Komakuk beach	Yukon	Canada	68.1121	sg	3	70	460	390	MP	Fritz, M. et al., 2012
51	-139.013	69.5679	Herschel Island	Yukon	Canada	75.6757	sg	1	40	590	550	MP	Fritz, M. et al., 2012
52	-114.963	62.5278	Great slave lake&12&13&Boundary Creek bh1-5	NW Territories	Canada	53.9176		16	50	800	750	M	Wolfe, S. A. et al. 2014
53	136.08	74.06	Stolbovoy Island	Sakha Republic	Russia	58.1395	sg	1	80	180	100	M	Schirrmeister, L. et al., 2003
54	135.587	75.366	Kotelny Island	Sakha Republic	Russia	68.9655	sg	1	160	270	110	M	Schirrmeister, L. et al., 2003
55	138.454	74.7334	Kotelny Island	Sakha Republic	Russia	68.4211	sg	1	150	800	650	M	Schirrmeister, L. et al., 2003
56	142.161	74.8694	Bunge land (high)	Sakha Republic	Russia	38.9831	sg	1	150	300	150	M	Schirrmeister, L. et al., 2003
57	140.387	74.8392	Bunge land (low)	Sakha Republic	Russia	49.2958	sg	1	20	50	30	M	Schirrmeister, L. et al., 2003
58	146.648	75.1193	Island Novaya Sibir	Sakha Republic	Russia	62.1053	sg	1	120	1080	960	M	Schirrmeister, L. et al., 2003
59	140.351	74.246	Maly Lyakhovsky Island	Sakha Republic	Russia	70.7317	sg	1	210	500	290	M	Schirrmeister, L. et al., 2003
60	143.551	72.6753	Oyogos yar	Sakha Republic	Russia	64	sg	1	240	640	400	M	Schirrmeister, L. et al., 2003
61	123.799	72.974	Turakh-Sise (Lena delta)	Sakha Republic	Russia	41.994	sg	1	164	640	476	M	Schirrmeister, L. et al., 2007
62	124.181	72.9402	Khardang-Sise (Lena delta)	Sakha Republic	Russia	50.0366	sg	2	40	500	460	MP	Schirrmeister, L. et al., 2007
63	117.142	73.6088	Cape Mamontov Klyk profiles1&2	Sakha Republic	Russia	67.8571	sg	2	100	2600	2500	MP	Schirrmeister, L. et al., 2008
64	116.875	73.637	Cape Mamontov Klyk (Mak-14)	Sakha Republic	Russia	70.7317	sg	1	50	250	200	M	Schirrmeister, L. et al., 2008
89	-20.549	74.472	Zackenberg (c1)	Greenland	Greenland	47.8261	sg	1	100	600	500	M	Gilbert, G. L. et al. 2017
90	-20.56	74.4685	Zackenberg (c2)	Greenland	Greenland	42.8571	sg	1	100	600	500	M	Gilbert, G. L. et al. 2017
91	11.8444	78.9383	Knudsenheia	Svalbard	Norway	29.4118	sg	1	80	300	220	M	Schwamborn, G. et al., 2008
92	12.1014	78.9089	Midre Lovenbreen	Svalbard	Norway	21.7391	sg	1	80	310	230	M	Schwamborn, G. et al., 2008
93	57.6297	68.762	Pesyakov Island	Nenets	Russia	27.2549	sg	3	300	600	300	M	Le, T. M. H. et al., 2018
94	-149.543	61.3812	Anchorage	Alaska	Alaska	49.8519	sg	3	350	800	450	M	Kanevskiy, M. et al., 2013a
95	18.9733	68.3473	Storflaket	Abisko	Sweden	56.0117	sg	1	70	250	180	P	Väisänen, M. et al., 2020
96	74.8233	63.1611	N-1	W Siberian peatlands	Russia	91.7405	sg	1	27	232	205	P	Smith, L. C. et al., 2012
98	76.5356	63.1406	N-10	W Siberian peatlands	Russia	88.8988	sg	1	38	100	62	P	Smith, L. C. et al., 2012
99	76.8167	63.4999	N-12	W Siberian peatlands	Russia	90.3612	sg	1	38	210	172	P	Smith, L. C. et al., 2012
100	76.6427	63.7707	N-13	W Siberian peatlands	Russia	86.1698	sg	1	28	159	131	P	Smith, L. C. et al., 2012
101	75.5108	63.7721	N-14	W Siberian peatlands	Russia	86.5757	sg	1	38	80	42	P	Smith, L. C. et al., 2012
102	74.2693	63.65	N-15	W Siberian peatlands	Russia	94.8491	sg	1	38	209	171	P	Smith, L. C. et al., 2012
103	75.5319	64.4962	N-16	W Siberian peatlands	Russia	92.6475	sg	1	38	80	42	P	Smith, L. C. et al., 2012
104	74.9867	64.072	N-17	W Siberian peatlands	Russia	76.686	sg	1	38	120	82	P	Smith, L. C. et al., 2012
105	75.2172	62.8526	N-18	W Siberian peatlands	Russia	93.8638	sg	1	38	69	31	P	Smith, L. C. et al., 2012
106	74.2628	62.9579	N-19	W Siberian peatlands	Russia	92.6777	sg	1	38	200	162	P	Smith, L. C. et al., 2012
107	76.6791	66.4611	E-101	W Siberian peatlands	Russia	93.5795	sg	1	38	250	212	P	Smith, L. C. et al., 2012
108	76.5932	66.0411	E-102	W Siberian peatlands	Russia	91.333	sg	1	39	110	71	P	Smith, L. C. et al., 2012
109	76.4845	66.7441	E-103	W Siberian peatlands	Russia	92.5294	sg	1	29	230	201	P	Smith, L. C. et al., 2012
110	77.3454	65.9984	E-106	W Siberian peatlands	Russia	90.7269	sg	1	39	60	21	P	Smith, L. C. et al., 2012
111	75.855	66.0085	E-107	W Siberian peatlands	Russia	92.1005	sg	1	39	77	38	P	Smith, L. C. et al., 2012
112	75.2898	65.8587	E-108	W Siberian peatlands	Russia	92.907	sg	1	39	143	104	P	Smith, L. C. et al., 2012
113	76.9943	66.4698	E-110	W Siberian peatlands	Russia	90.6874	sg	1	29	213	184	P	Smith, L. C. et al., 2012
114	79.1379	66.1994	E-111&112	W Siberian peatlands	Russia	95.8368	sg	2	39	400	361	P	Smith, L. C. et al., 2012
116	79.3234	66.4497	E-113	W Siberian peatlands	Russia	93.3446	sg	1	39	328	289	P	Smith, L. C. et al., 2012
117	75.4346	67.8094	E-115	W Siberian peatlands	Russia	83.7805	sg	1	29	99	70	P	Smith, L. C. et al., 2012
119	75.5025	65.4998	E-119	W Siberian peatlands	Russia	92.5762	sg	1	39	320	281	P	Smith, L. C. et al., 2012
120	77.9605	65.6079	E-120	W Siberian peatlands	Russia	90.4741	sg	1	39	70	31	P	Smith, L. C. et al., 2012
121	73.0058	65.5831	D-122	W Siberian peatlands	Russia	90.0554	sg	1	49	100	51	P	Smith, L. C. et al., 2012
122	71.0309	64.4224	D-123	W Siberian peatlands	Russia	91.1226	sg	1	49	110	61	P	Smith, L. C. et al., 2012
123	72.9697	65.0842	D-124	W Siberian peatlands	Russia	88.5167	sg	1	39	88	49	P	Smith, L. C. et al., 2012
124	72.1616	64.5227	D-125	W Siberian peatlands	Russia	92.31	sg	1	29	220	191	P	Smith, L. C. et al., 2012
125	70.2948	64.3068	D-127	W Siberian peatlands	Russia	94.1352	sg	1	59	220	161	P	Smith, L. C. et al., 2012
126	72.4631	65.55	D-128	W Siberian peatlands	Russia	95.7943	sg	1	39	220	181	P	Smith, L. C. et al., 2012
127	73.7471	66.6085	P-129	W Siberian peatlands	Russia	92.5015	sg	1	29	270	241	P	Smith, L. C. et al., 2012
128	74.5306	66.8689	P-130	W Siberian peatlands	Russia	90.9458	sg	1	39	80	41	P	Smith, L. C. et al., 2012
129	73.9888	66.1664	P-131	W Siberian peatlands	Russia	89.0455	sg	1	31	134	103	P	Smith, L. C. et al., 2012
130	73.9488	66.4997	P-132	W Siberian peatlands	Russia	91.3602	sg	1	49	81	32	P	Smith, L. C. et al., 2012
131	74.3478	65.7933	P-133	W Siberian peatlands	Russia	94.7635	sg	1	49	430	381	P	Smith, L. C. et al., 2012
133	75.3611	64.1476	G-136	W Siberian peatlands	Russia	90.7723	sg	1	49	160	111	P	Smith, L. C. et al., 2012
134	75.7661	63.7504	G-137	W Siberian peatlands	Russia	93.9613	sg	1	51	178	127	P	Smith, L. C. et al., 2012
135	76.6731	64.5168	G-138	W Siberian peatlands	Russia	94.4884	sg	1	59	136	77	P	Smith, L. C. et al., 2012
137	79.5476	64.2709	G-140	W Siberian peatlands	Russia	88.8863	sg	1	49	119	70	P	Smith, L. C. et al., 2012
140	-114.278	62.5058	B1A&B1B&B1C	Yellowknife	Canada	53.6401	sg	3	70	360	290	M	Wolfe, S. A. et al. 2011
143	-114.117	62.6026	HSB1A&HST1A&6	Yellowknife	Canada	77.25	sg	6	20	350	330	M	Wolfe, S. A. et al. 2011
144	-114.113	62.6052	B2A&MS1A&BS1A&5&7	Yellowknife	Canada	58.9393	sg	11	40	350	310	M	Wolfe, S. A. et al. 2011
147	-114.531	62.4563	PS1A&PS1B&UB-1	Yellowknife	Canada	92.2627	sg	3	40	300	260	P	Wolfe, S. A. et al. 2011
148	-114.225	62.5045	MS2A	Yellowknife	Canada	53.4451	sg	1	30	300	270	M	Wolfe, S. A. et al. 2011
149	-114.016	62.5541	PC1A	Yellowknife	Canada	87.2872	sg	1	40	500	460	P	Wolfe, S. A. et al. 2011
151	-113.998	62.556	MST1A	Yellowknife	Canada	55.4737	sg	1	40	140	100	M	Wolfe, S. A. et al. 2011
152	-113.358	62.5414	ST10-07	Yellowknife	Canada	77.5537	sg	1	40	298	258	P	Wolfe, S. A. et al. 2011
161	-154.484	70.7549	PG-IKP15-T1-0&T1-1	Ikpikpuk R delta	Alaska	50.4939		2	85	195	110	M	Fuchs, M. et al., 2018
163	-154.482	70.7535	PG-IKP15-T1-2&T1-3	Ikpikpuk R delta	Alaska	59.1044		2	40	215	175	M	Fuchs, M. et al., 2018
165	-154.436	70.7914	PG-IKP-DELT-1	Ikpikpuk R delta	Alaska	43.3252		1	69	200	131	MP	Fuchs, M. et al., 2018
166	-151.383	70.348	PG-FCR-DELT-2	Fish Creek R Delta	Alaska	36.4909		1	69	120	51	MP	Fuchs, M. et al., 2018
167	-151.344	70.3739	PG-FCR-DELT-3	Fish Creek R Delta	Alaska	58.7176		1	69	104	35	MP	Fuchs, M. et al., 2018
168	-151.339	70.3858	PG-FCR-DELT-5a	Fish Creek R Delta	Alaska	51.2182		1	69	157	88	MP	Fuchs, M. et al., 2018
180	-148.902	65.5556	AUTC08-5&7&8	Interior Alaska	Alaska	65.4892		3	25	510	485	M	Shur, Y. et al., 2010
183	-148.91	65.5586	AUTC08-8	Interior Alaska	Alaska	86.2652		1	35	470	435	M	Shur, Y. et al., 2010
221	-144.483	70.0164	BSC42	Beaufort Sea Coast	Alaska	10.8681		1	45	100	55	M	Kanevskiy, M. et al., 2013b
232	-156.336	71.2594	BSC02	Beaufort Sea Coast	Alaska	89.2812		1	30	220	190	M	Kanevskiy, M. et al., 2013b
233	-155.926	71.2115	BSC03	Beaufort Sea Coast	Alaska	72.2933		1	45	110	65	M	Kanevskiy, M. et al., 2013b
234	-155.592	71.0478	BSC04	Beaufort Sea Coast	Alaska	80.6375		1	45	145	100	M	Kanevskiy, M. et al., 2013b
236	-155.997	70.8949	BSC06	Beaufort Sea Coast	Alaska	26.6488		1	45	190	145	M	Kanevskiy, M. et al., 2013b
237	-155.88	70.8253	BSC08	Beaufort Sea Coast	Alaska	77.8556		1	47	108	61	M	Kanevskiy, M. et al., 2013b
238	-155.485	70.8737	BSC10	Beaufort Sea Coast	Alaska	75.8321		1	45	170	125	M	Kanevskiy, M. et al., 2013b
239	-155.24	71.0574	BSC11	Beaufort Sea Coast	Alaska	92.3841		1	45	205	160	M	Kanevskiy, M. et al., 2013b
240	-155.068	71.0765	BSC12	Beaufort Sea Coast	Alaska	79.1275		1	45	110	65	M	Kanevskiy, M. et al., 2013b
241	-154.532	70.8201	BSC15	Beaufort Sea Coast	Alaska	85.5915		1	65	213	148	M	Kanevskiy, M. et al., 2013b
242	-154.177	70.7681	BSC16	Beaufort Sea Coast	Alaska	85.6978		1	45	270	225	M	Kanevskiy, M. et al., 2013b
243	-153.338	70.8932	BSC17	Beaufort Sea Coast	Alaska	69.9175		1	50	230	180	M	Kanevskiy, M. et al., 2013b
244	-152.882	70.8558	BSC18	Beaufort Sea Coast	Alaska	72.4932		1	35	222	187	M	Kanevskiy, M. et al., 2013b
245	-152.522	70.8708	BSC19	Beaufort Sea Coast	Alaska	79.8147		1	40	223	183	M	Kanevskiy, M. et al., 2013b
246	-152.382	70.7157	BSC20	Beaufort Sea Coast	Alaska	77.4011		1	26	210	184	M	Kanevskiy, M. et al., 2013b
247	-152.298	70.6021	BSC21	Beaufort Sea Coast	Alaska	84.9606		1	60	145	85	M	Kanevskiy, M. et al., 2013b
248	-152.538	70.5755	BSC22	Beaufort Sea Coast	Alaska	90.6686		1	48	355	307	M	Kanevskiy, M. et al., 2013b
249	-152.088	70.5474	BSC23	Beaufort Sea Coast	Alaska	88.1755		1	60	165	105	M	Kanevskiy, M. et al., 2013b
251	-151.617	70.4347	BSC25	Beaufort Sea Coast	Alaska	35.2437		1	185	230	45	M	Kanevskiy, M. et al., 2013b
252	-150.939	70.4333	BSC27	Beaufort Sea Coast	Alaska	85.7656		1	40	165	125	M	Kanevskiy, M. et al., 2013b
253	-150.105	70.4236	BSC29A	Beaufort Sea Coast	Alaska	90.2337		1	60	125	65	M	Kanevskiy, M. et al., 2013b
254	-150.094	70.4333	BSC29B	Beaufort Sea Coast	Alaska	89.8112		1	55	164	109	M	Kanevskiy, M. et al., 2013b
255	-149.439	70.5042	BSC30	Beaufort Sea Coast	Alaska	34.6539		1	40	185	145	M	Kanevskiy, M. et al., 2013b
256	-149.026	70.4505	BSC31	Beaufort Sea Coast	Alaska	43.2563		1	50	185	135	M	Kanevskiy, M. et al., 2013b
257	-148.701	70.4049	BSC32	Beaufort Sea Coast	Alaska	69.388		1	50	220	170	M	Kanevskiy, M. et al., 2013b
258	-147.994	70.2671	BSC34	Beaufort Sea Coast	Alaska	54.5143		1	80	247	167	M	Kanevskiy, M. et al., 2013b
259	-147.744	70.2184	BSC35	Beaufort Sea Coast	Alaska	63.0712		1	16	152	136	M	Kanevskiy, M. et al., 2013b
260	-147.221	70.1654	BSC36	Beaufort Sea Coast	Alaska	82.2378		1	60	122	62	M	Kanevskiy, M. et al., 2013b
261	-146.183	70.1622	BSC38	Beaufort Sea Coast	Alaska	77.9692		1	50	105	55	M	Kanevskiy, M. et al., 2013b
262	-145.81	70.1451	BSC39	Beaufort Sea Coast	Alaska	84.3549		1	40	140	100	M	Kanevskiy, M. et al., 2013b
263	-145.535	70.0575	BSC40	Beaufort Sea Coast	Alaska	74.8626		1	78	258	180	M	Kanevskiy, M. et al., 2013b
264	-145.151	69.9894	BSC40B	Beaufort Sea Coast	Alaska	70.7214		1	41	164	123	M	Kanevskiy, M. et al., 2013b
265	-144.939	69.9295	BSC41	Beaufort Sea Coast	Alaska	79.594		1	30	75	45	M	Kanevskiy, M. et al., 2013b
266	-144.672	69.9648	BSC41B	Beaufort Sea Coast	Alaska	71.3495		1	100	265	165	M	Kanevskiy, M. et al., 2013b
267	-144.019	70.0607	BSC43	Beaufort Sea Coast	Alaska	32.0485		1	40	165	125	M	Kanevskiy, M. et al., 2013b
268	-143.671	70.0823	BSC44	Beaufort Sea Coast	Alaska	53.3435		1	41	117	76	M	Kanevskiy, M. et al., 2013b
269	-143.315	70.1081	BSC45	Beaufort Sea Coast	Alaska	45.5359		1	135	220	85	M	Kanevskiy, M. et al., 2013b
270	-142.723	70.0356	BSC46	Beaufort Sea Coast	Alaska	91.4376		1	45	180	135	M	Kanevskiy, M. et al., 2013b
271	-142.505	69.9521	BSC47	Beaufort Sea Coast	Alaska	80.18		1	40	101	61	M	Kanevskiy, M. et al., 2013b
272	-141.724	69.7773	BSC49	Beaufort Sea Coast	Alaska	57.6297		1	67	210	143	M	Kanevskiy, M. et al., 2013b
273	-141.196	69.6829	BSC50	Beaufort Sea Coast	Alaska	73.0851		1	62	208	146	M	Kanevskiy, M. et al., 2013b
275	-151.074	70.4115	COL3-2	Beaufort Sea Coast	Alaska	70.9734		1	70	207	137	M	Kanevskiy, M. et al., 2013b
276	-164.619	66.2894	DM1-15 (lake basin)	Seward Peninsula	Alaska	64.4426	sg	1	75	200	125	MP	Shur, Y. et al., 2012
279	-156.714	71.295	BW-HC1-3	Barrow	Alaska	79.5698		3	60	300	240	MP	Kanevskiy, M. et al., 2017
280	-148.423	70.2292	PB-HC1-3	Prudhoe Bay	Alaska	77.2539		3	50	200	150	P	Kanevskiy, M. et al., 2017
282	-148.471	70.2232	T1&2 polygon centres	Prudhoe Bay	Alaska	78.3333		12	60	200	140	MP	Walker, D. A. et al., 2015
286	93.08	35.198	QT5	Wudaoling2	Tibetan Plateau	34.2922	sg	1	170	220	50	MP	Wang, W. et al., 2019
291	130.474	61.7597	YED1	Yukechi Alas, C Yakutia	Russia	35.6593		1	198	691	493	MP	Windrisch, T. et al., 2019
292	-110.236	64.5999	1005&2004	Slave Geol. Province, N.W.T.	Canada	80.3211	sg	2	75	349	274	P	Subedi, R. et al., 2020
293	-110.233	64.6037	1006&1007	Slave Geol. Province, N.W.T.	Canada	75.1603	sg	2	42	440	398	P	Subedi, R. et al., 2020
295	-110.443	64.7015	1009&2011&2012&2015	Slave Geol. Province, N.W.T.	Canada	69.1001	sg	4	57	360	303	M	Subedi, R. et al., 2020
296	-110.44	64.7027	1010&2019	Slave Geol. Province, N.W.T.	Canada	71.5405	sg	2	15	500	485	M	Subedi, R. et al., 2020
297	-110.735	64.6254	1014	Slave Geol. Province, N.W.T.	Canada	92.7717	sg	1	403	885	482	M	Subedi, R. et al., 2020
299	-110.233	64.5966	2005&2006	Slave Geol. Province, N.W.T.	Canada	77.2081	sg	2	185	420	235	M	Subedi, R. et al., 2020
301	-110.185	64.6003	2008&2028&2029	Slave Geol. Province, N.W.T.	Canada	42.7013	sg	3	120	624	504	M	Subedi, R. et al., 2020
304	-110.45	64.7028	2013	Slave Geol. Province, N.W.T.	Canada	51.2591	sg	1	180	250	70	M	Subedi, R. et al., 2020
306	-110.436	64.7136	2018	Slave Geol. Province, N.W.T.	Canada	76.7785	sg	1	30	280	250	M	Subedi, R. et al., 2020
310	-110.215	64.6055	2033	Slave Geol. Province, N.W.T.	Canada	84.7712	sg	1	262	510	248	M	Subedi, R. et al., 2020
327	147.484	70.8308	AWI_12Kyt-0807-1		Russia	75.2397	sg	1	37	70	33	M	Schirrmeister, L. et al., 2018
328	160.939	69.095	AWI_12P-1707-1 & 1907-2 & 1607-1		Russia	81.9192	sg	3	41	125	84	P	Schirrmeister, L. et al., 2018
329	161.002	69.1038	AWI_12P-2107-2 & 1		Russia	88.9494	sg	2	34	105	71	P	Schirrmeister, L. et al., 2018
331	95.3628	52.53	Merzlyi Yar	Bolshoi Yenisei R.	Russia	62.5	sg	1	150	150		M	Alexeev, S. et al., 2007
332	-109.567	74.9148	15P04	Melville I.	Canada	70.3429		1	85	260	175	M	Paquette, M. et al., 2020
333	126.288	72.3333	Bkh1	Kurungnakh/	Russia	35.9225	sg	1	700	1200	500	M	Schirrmeister, L. et al., 2017a
334	126.311	72.3453	Bkh2	Kurungnakh/Bkh2	Russia	70.8336	sg	1	300	380	80	MP	Schirrmeister, L. et al., 2017a
335	123.212	72.8803	Nag4-50	Nagym/Nag4-50	Russia	62.0807	sg	2	40	440	400	MP	Schirrmeister, L. et al., 2017b
337	123.206	72.8792	Nag1-80	Nagym/Nag1-80	Russia	67.033	sg	1	100	600	500	MP	Schirrmeister, L. et al., 2017b
338	129.415	71.7834	Byk_98_Mkh	Bykovsky Peninsula	Russia	72.356	sg	1	70	400	330	M	Schirrmeister, L. et al., 2020
339	92.9225	34.826	SM&AG&SG	Tibetan plateau	China	15.8333		27	200	500	300	M	Lin, Z. et al., 2020
340	92.9591	34.8145	AM&TA&AD	Tibetan plateau	China	9.63333		27	200	500	300	M	Lin, Z. et al., 2020
345	92.9206	34.8367	SunS	Tibetan plateau	China	34		9	200	500	300	M	Lin, Z. et al., 2020
346	92.9268	34.8486	ShaS	Tibetan plateau	China	20		9	200	500	300	M	Lin, Z. et al., 2020
355	-67.6181	76.0329	GL3	Thule	Greenland	57.2504	sg	1	20	318	298	P	Wetterich, S. et al., 2019
356	-70.041	76.5691	SI1	Saunders Island	Greenland	53.578	sg	1	10	198	188	P	Wetterich, S. et al., 2019
357	-127.319	65.4024	Billy Creek North 01	S Mackenzie corridor	Canada	38.3466	sg	1	90	560	470	M	Smith, S. L. et al., 2009
358	-128.284	65.8958	Chick Lake 01	S Mackenzie corridor	Canada	69.0878	sg	1	50	550	500	M	Smith, S. L. et al., 2009
359	-127.621	65.5204	Elliot Creek 01&02	S Mackenzie corridor	Canada	50.7272	sg	2	110	580	470	M	Smith, S. L. et al., 2009
361	-122.405	62.3166	Ebbutt Hill 01	S Mackenzie corridor	Canada	61.8947	sg	1	30	315	285	M	Smith, S. L. et al., 2009
362	-127.888	65.7473	Gibson Lake 01	S Mackenzie corridor	Canada	39.1831	sg	1	120	590	470	M	Smith, S. L. et al., 2009
363	-127.834	65.6697	Hanna River 01	S Mackenzie corridor	Canada	70.212	sg	1	90	500	410	M	Smith, S. L. et al., 2009
364	-128.469	66.2849	Jackfish Creek 02	S Mackenzie corridor	Canada	34.9005	sg	1	60	550	490	M	Smith, S. L. et al., 2009
365	-124.732	64.4278	Little Smith Creek 02	S Mackenzie corridor	Canada	39.9666	sg	1	100	420	320	M	Smith, S. L. et al., 2009
366	-127.438	65.4366	Oscar Creek 01	S Mackenzie corridor	Canada	56.0155	sg	1	80	550	470	M	Smith, S. L. et al., 2009
367	-124.838	64.6523	Old Fort Point 01	S Mackenzie corridor	Canada	47.2527	sg	1	100	300	200	M	Smith, S. L. et al., 2009
368	-123.18	62.931	River between Two Mountains 02	S Mackenzie corridor	Canada	48.0269	sg	1	100	320	220	M	Smith, S. L. et al., 2009
369	-128.351	66.0019	Snafu Creek 01	S Mackenzie corridor	Canada	60.0634	sg	1	150	550	400	M	Smith, S. L. et al., 2009
370	-124.485	64.2879	Saline River 02	S Mackenzie corridor	Canada	40.3974	sg	1	100	520	420	M	Smith, S. L. et al., 2009
371	-126.137	65.0981	Vermillion Creek 01	S Mackenzie corridor	Canada	55.5464	sg	1	60	520	460	M	Smith, S. L. et al., 2009
372	-126.127	65.0954	Vermillion Creek 02	S Mackenzie corridor	Canada	53.7074	sg	1	30	430	400	MP	Smith, S. L. et al., 2009
373	-123.084	62.7134	Willowlake River 01	S Mackenzie corridor	Canada	44.3586	sg	1	250	270	20	M	Smith, S. L. et al., 2009
394	-114.288	62.4958	1&2	North Slave, Yellowknife	Canada	56.2493		8	100	200	100	M	Paul, J. R. et al., 2020
396	-114.326	62.5247	3	North Slave, Yellowknife	Canada	61.7228		4	100	200	100	M	Paul, J. R. et al., 2020
397	-114.057	62.5776	4	North Slave, Yellowknife	Canada	62.4348		4	100	200	100	M	Paul, J. R. et al., 2020
401	-114.225	62.5082	8	North Slave, Yellowknife	Canada	54.826		4	100	200	100	M	Paul, J. R. et al., 2020
402	-114.313	62.5274	9	North Slave, Yellowknife	Canada	69.6735		4	100	200	100	M	Paul, J. R. et al., 2020
403	-114.986	62.5422	10	North Slave, Yellowknife	Canada	62.3132		3	100	200	100	M	Paul, J. R. et al., 2020
404	-114.975	62.535	11	North Slave, Yellowknife	Canada	61.7258		3	100	200	100	M	Paul, J. R. et al., 2020
407	-114.127	62.5977	14	North Slave, Yellowknife	Canada	48.6994		4	100	200	100	M	Paul, J. R. et al., 2020
408	-114.116	62.5957	15	North Slave, Yellowknife	Canada	52.1951		4	100	200	100	M	Paul, J. R. et al., 2020
409	-115.012	62.5539	16	North Slave, Yellowknife	Canada	68.0356		3	100	200	100	M	Paul, J. R. et al., 2020
410	-114.307	62.4713	17	North Slave, Yellowknife	Canada	65.7098		2	100	200	100	M	Paul, J. R. et al., 2020
411	-114.313	62.4981	18	North Slave, Yellowknife	Canada	66.1222		2	100	200	100	M	Paul, J. R. et al., 2020
412	-114.971	62.5337	19	North Slave, Yellowknife	Canada	53.0599		3	100	200	100	M	Paul, J. R. et al., 2020
413	-114.89	62.5186	20	North Slave, Yellowknife	Canada	74.5318		4	100	200	100	MP	Paul, J. R. et al., 2020
414	-85.8959	79.9984	Eur1	Ellesmere Island	Canada	37.1728	sg	1	70	970	900	M	Steven, B. et al., 2007
415	-85.8394	80.0005	Eur3	Ellesmere Island	Canada	51.3733	sg	1	100	400	300	M	Steven, B. et al., 2008
416	-74.284	62.1233	Cores 1,2,4	Ungava Peninsula	Canada	61.3333		3	40	130	90	P	Seppälä, M. et al., 1991
417	-140.833	62.3333	Beaver Creek & Beaver Creek 2a & b	Beaver Creek	Canada	56.6869	sg	3	48	276	228	MP	Stephani, E. et al., 2010
418	147.495	70.8615	11-KH-2807		Russia	61.8901	sg	1	100	400	300	M	Schirrmeister, L. et al., 2012
419	-94.0568	61.0859	Arviat1a		Canada	75.3893		1	36	185	149	P	ADAPT 2016
420	-94.1078	61.0967	Arviat6a		Canada	67.8622		1	45	116	71	MP	ADAPT 2016
421	-140.839	62.3381	Beaver Creek 1a & b		Canada	74.808		4	36	302	266	M	ADAPT 2016
423	-80.0043	73.1503	Bylot I. 1_1-3		Canada	55.2445		3	15	180	165	M	ADAPT 2016
424	-79.9667	73.1418	Bylot I. 2_1-2		Canada	63.6078		2	41	156	115	M	ADAPT 2016
425	-76.2208	56.6164	BGR 1 & 2 (MA)		Canada	53.95		2	55	310.8	255.8	P	ADAPT 2016
426	-93.8366	58.7271	Churchill 1a		Canada	69.5846		4	19	191	172	P	ADAPT 2016
430	-111.576	64.8697	Daring Lake 2a & b		Canada	26.4287		2	0	249	249	MP	ADAPT 2016
431	-77.6958	55.2261	SAS2 A1 & A2		Canada	82.4184		2	45	232	187	P	ADAPT 2016
432	-76.4619	56.5478	Umiujaq VDT1		Canada	49.9755		1	112	305	193	M	ADAPT 2016
435	93.4462	35.364	Chumaer River		China	20		1	800	900	100	M	Yu, F. et al., 2013
436	93.042	35.1385	Kekexili mtns.		China	10		1	820	920	100	M	Yu, F. et al., 2013
444	-139.317	64.0319	DC_BH02	Dawson City	Canada	47.9734		1	55	305	250	M	Benkert, B. E. et al., 2015c
445	-139.443	64.0836	DC_BH03	Dawson City	Canada	62.0681		1	30	410	380	M	Benkert, B. E. et al., 2015c
446	-139.482	64.0449	DC_BH04	Dawson City	Canada	64.2265		2	43	445	402	M	Benkert, B. E. et al., 2015c
448	-139.426	64.0682	DC_BH08	Dawson City	Canada	60.0302		1	80	515	435	M	Benkert, B. E. et al., 2015c
455	9.93114	46.4965	Muot da Barba Peider	The Alps	Switzerland	8.37		1	250	450	200	M	Blanchet, J. and Davison, A. C. 2012
468	-140.408	62.1152	BH16	Beaver Creek	Canada	73		1	59	206	147	M	Pumple, J. 2016
469	-140.708	62.2691	BH15	Beaver Creek	Canada	76.3333		1	42	300	258	M	Pumple, J. 2016
470	-140.457	62.1683	BH17	Beaver Creek	Canada	69.1		1	53	274	221	M	Pumple, J. 2016
471	-140.476	62.1828	BH18	Beaver Creek	Canada	75.1176		1	53	308	255	M	Pumple, J. 2016
472	-140.491	62.1895	BH19	Beaver Creek	Canada	72.25		1	42	261	219	M	Pumple, J. 2016
473	-140.509	62.2069	BH20	Beaver Creek	Canada	72.125		1	81	477	396	M	Pumple, J. 2016
474	-140.889	62.5101	BH11	Beaver Creek	Canada	68.8095		1	100	590	490	MP	Pumple, J. 2016
475	-140.977	62.5514	BH12E	Beaver Creek	Canada	60.52		4	40	550	510	M	Pumple, J. 2016
479	-140.578	62.3421	BH13B	Beaver Creek	Canada	81.6154		1	61	282	221	P	Pumple, J. 2016
480	63.6515	67.2964	BP-1	Vorkuta	Russia	67.655	sg	1	110	150	40	P	Budantseva, N. A. et al., 2015
481	107.333	47.75	Nalaikh	Nalaikh	Mongolia	18.1818	sg	1	400	600	200	M	Wu, T. et al., 2009
482	-124.466	64.2802	Unburnt	Central Mackenzie Valley	Canada	64.1791	sg	1	130	150	20	M	Smith, S. L. et al., 2015
483	-135.217	60.5	palsa 10	Yukon	Canada	70.8502	sg	1	40	124	84	M	Coultis, T. L. and Lewkowicz, A. G. 2003
485	-161.965	67.9273	GT1-e1 & e2	Lake Mapsa	Alaska	36.6749	sg	2	80	405	325	M	Jorgenson, T. 2013
487	-149.544	68.526	GTH89-e1	Toolik Lake	Alaska	67.2664	sg	1	80	400	320	M	Jorgenson, T. 2013
489	-149.576	68.5555	IMN1-e2	I-minus 1 Lake	Alaska	74.439	sg	1	50	300	250	M	Jorgenson, T. 2013
491	-149.818	68.6659	ITK2-e1&e2	Itkillik River	Alaska	68.9362	sg	2	60	135	75	M	Jorgenson, T. 2013
492	-150.556	68.8793	ITK5-e1	Nanushuk River	Alaska	68.74	sg	1	20	510	490	M	Jorgenson, T. 2013
495	-149.622	68.6794	NE14-e1	Toolik Lake	Alaska	44.9442	sg	1	15	145	130	M	Jorgenson, T. 2013
500	-161.313	67.8583	BIMU-E1	Maiymerak Mtns.	Alaska	30.2579		1	100	125	25	M	Jorgenson, T. 2013
501	-162.357	67.9431	GT2-e1 & e2	Lake Mapsa	Alaska	71.8671		2	60	235	175	M	Jorgenson, T. 2013
502	-150.314	68.9607	HORN-e1	Horn Lake	Alaska	63.2894		1	47	100	53	M	Jorgenson, T. 2013
503	-149.523	68.5434	IMN2-e1	I-minus 1 Lake	Alaska	80.6574		1	20	80	60	M	Jorgenson, T. 2013
504	-149.578	68.8713	KTK1-e1 & e2	Kuparuk R. tributary	Alaska	87.5174		2	40	255	215	MP	Jorgenson, T. 2013
505	-150.74	68.9107	NANU-p1	Nanushuk River	Alaska	66.4851		1	19	100	81	M	Jorgenson, T. 2013
506	-159.294	68.0358	OK2-e1	Okoklik Lake	Alaska	67.2467		1	40	305	265	M	Jorgenson, T. 2013
507	-161.42	67.9255	Slope-e1	Maiymerak Mtns.	Alaska	72.3354		1	100	165	65	M	Jorgenson, T. 2013
508	-150.668	68.9621	VTK-p1	Nanushuk River	Alaska	54.4771		1	23	65	42	M	Jorgenson, T. 2013
509	-161.406	67.7347	WOCR-e1	Eli River	Alaska	38.1656		1	60	125	65	M	Jorgenson, T. 2013
537	-156.41	71.2401	B1-CHRONO-CPW-7	North Slope	Alaska	75.4218		1	33	215	182	MP	Kanevskiy, M. et al., 2020a
538	-156.478	71.2288	B2-HSDO-CPW-4	North Slope	Alaska	71.612		1	70	124	54	MP	Kanevskiy, M. et al., 2020a
539	-156.698	71.2907	B3-CHRONO-CPW-5	North Slope	Alaska	65.9862		1	33	120	87	MP	Kanevskiy, M. et al., 2020a
540	-156.661	71.2771	B4-CHRONO-CPW-1	North Slope	Alaska	66.3637		1	36	92	56	MP	Kanevskiy, M. et al., 2020a
541	-153.828	70.7305	T1-CHRONO-CPC-1	North Slope	Alaska	69.1864		1	48	179	131	MP	Kanevskiy, M. et al., 2020a
542	-153.642	70.7399	T2-CHRONO-CPC-2	North Slope	Alaska	58.182		1	59	129	70	MP	Kanevskiy, M. et al., 2020a
543	-153.749	70.7543	T3-CHRONO-CPC-6	North Slope	Alaska	70.9316		1	45	157	112	M	Kanevskiy, M. et al., 2020a
544	-154	70.7885	T4-CHRONO-CPC-3	North Slope	Alaska	63.7371		1	66	114	48	M	Kanevskiy, M. et al., 2020a
545	-153.952	70.7486	T5-CHRONO-CPC-7	North Slope	Alaska	73.3197		1	55	147	92	M	Kanevskiy, M. et al., 2020a
546	-153.92	70.7466	T6-CHRONO-CPC-8	North Slope	Alaska	77.0091		1	58	128	70	M	Kanevskiy, M. et al., 2020a
548	-153.907	70.8646	T8-Drew Point	North Slope	Alaska	68.7403		2	37	70	33	MP	Kanevskiy, M. et al., 2020a
550	-152.966	70.5686	T10-East Teshekpuk	North Slope	Alaska	71.1444		1	30	105	75	M	Kanevskiy, M. et al., 2020a
551	-153.153	70.2628	I1-Pik dunes-peat	North Slope	Alaska	57.3494		1	74	101	27	MP	Kanevskiy, M. et al., 2020a
553	-153.646	70.167	I4-CHRONO-SS-Pingo	North Slope	Alaska	56.84		1	67	91	24	M	Kanevskiy, M. et al., 2020a
554	-153.023	69.9451	I5-CHRONO-SS-7	North Slope	Alaska	65.3041		1	40	76	36	MP	Kanevskiy, M. et al., 2020a
555	-153.272	69.9884	I6-CHRONO-SS-8	North Slope	Alaska	36.245		1	96	116	20	M	Kanevskiy, M. et al., 2020a
556	-153.826	69.5812	I7-CHRONO-LB-7A	North Slope	Alaska	71.2545		1	65	203	138	M	Kanevskiy, M. et al., 2020a
557	-153.849	69.5757	I8-CHRONO-LB-7B	North Slope	Alaska	82.7688		1	28	143	115	P	Kanevskiy, M. et al., 2020a
558	-153.094	69.9897	I9-Inigok	North Slope	Alaska	37.5867		1	70	97	27	M	Kanevskiy, M. et al., 2020a
559	-156.225	70.0011	O1-CHRONO-LB-Camp	North Slope	Alaska	76.6788		1	52	125	73	MP	Kanevskiy, M. et al., 2020a
560	-156.276	70.0023	O2-CHRONO-LB	North Slope	Alaska	70.1664		1	65	123	58	M	Kanevskiy, M. et al., 2020a
561	-156.246	69.9979	O3-CHRONO-LB	North Slope	Alaska	76.0534		1	54	140	86	MP	Kanevskiy, M. et al., 2020a
562	-156.258	69.996	O4-CHRONO-LB	North Slope	Alaska	76.83		1	52	105	53	MP	Kanevskiy, M. et al., 2020a
563	-157.081	70.0368	A1-Piksiksak	North Slope	Alaska	73.095		1	27	112	85	MP	Kanevskiy, M. et al., 2020a
592	-143.605	69.747	C43-MSI	Jago River	Alaska	79.4967		1	70	242	172	MP	Kanevskiy, M. et al., 2020b
595	-147.731	64.871	Creamer's Field transect	Fairbanks	Alaska	80.589		8	50	420	370	P	Kanevskiy, M. et al., 2015
600	-147.03	64.7648	YMA2	Horseshoe Lake	Alaska	62.8557		1	65	323	258	M	Kanevskiy, M. and Jorgenson, M. T. 2015
601	-147.077	64.759	HL-T1 290&345	Horseshoe Lake	Alaska	51.8093		2	138	287	149	M	Kanevskiy, M. and Jorgenson, M. T. 2015
602	-147.053	64.7642	HL-T2 274	Horseshoe Lake	Alaska	57.649		1	95	442	347	M	Kanevskiy, M. and Jorgenson, M. T. 2015
603	-147.045	64.7598	HL-YH1	Horseshoe Lake	Alaska	48.5429		1	435	510	75	M	Kanevskiy, M. and Jorgenson, M. T. 2015
607	-133.762	68.5379	NTGS2&3	Inuvik-Tuktoyaktuk	Canada	51.753	sg	2	100	600	500	M	Ensom, T. et al., 2020
609	-133.542	68.7494	NTGS4	Inuvik-Tuktoyaktuk	Canada	86.0282	sg	1	90	540	450	P	Ensom, T. et al., 2020
610	-133.541	68.7521	NTGS5	Inuvik-Tuktoyaktuk	Canada	71.4111	sg	1	90	550	460	M	Ensom, T. et al., 2020
611	-133.545	68.7591	NTGS6	Inuvik-Tuktoyaktuk	Canada	48.8258	sg	1	94	550	456	MP	Ensom, T. et al., 2020
612	-133.275	69.0188	NTGS7	Inuvik-Tuktoyaktuk	Canada	61.4535	sg	1	100	600	500	M	Ensom, T. et al., 2020
613	-133.271	69.0126	NTGS8	Inuvik-Tuktoyaktuk	Canada	72.6495	sg	1	100	600	500	P	Ensom, T. et al., 2020
614	-133.307	69.0129	NTGS9	Inuvik-Tuktoyaktuk	Canada	84.4149	sg	1	100	600	500	P	Ensom, T. et al., 2020
615	-132.935	69.2705	NTGS10	Inuvik-Tuktoyaktuk	Canada	91.3171	sg	1	180	600	420	M	Ensom, T. et al., 2020
616	-132.942	69.2682	NTGS12	Inuvik-Tuktoyaktuk	Canada	51.4406	sg	1	100	575	475	M	Ensom, T. et al., 2020
617	-133.281	69.0144	NTGS17	Inuvik-Tuktoyaktuk	Canada	95.7488	sg	1	100	600	500	M	Ensom, T. et al., 2020
619	-20.5546	74.4727	WS	Zackenberg	Greenland	47.1368		1	83	200	117	M	Rasmussen, L. H. et al. 2018
620	-110.142	64.5661	INAC-4	Lac de Gras	Canada	22.2714	sg	1	320	502	182	M	Wolfe, S. A. et al., 1997
621	-110.155	64.5704	INAC-6&7&8	Lac de Gras	Canada	28.9279	sg	3	76	549	473	M	Wolfe, S. A. et al., 1997
624	-111.471	66.0148	INAC-9	Contwoyto Lake	Canada	42.5274	sg	1	312	625	313	M	Wolfe, S. A. et al., 1997
625	-111.466	66.0275	96BGC-03	Contwoyto Lake	Canada	42.4	sg	1	300	500	200	M	Wolfe, S. A. 1998
626	-116.314	62.0289	HWY3-UB-1A		Canada	65.0648	sg	1	70	143	73	M	Holloway, J. 2020
628	-147.621	64.909	Shallow core		Alaska	49.6081	sg	1	90	303	213	M	Oliver, L. K. 2012
629	-162.423	66.7299	BAL16-B3	Baldwin Peninsula	Alaska	84.7458	sg	1	85	200	115	M	Jongejans, L. L. et al., 2018
630	-162.502	66.7365	BAL16-B4	Baldwin Peninsula	Alaska	64.5322	sg	1	120	618	498	M	Jongejans, L. L. et al., 2018
631	-162.457	66.7306	BAL16-B5	Baldwin Peninsula	Alaska	82.2368	sg	1	65	99	34	M	Jongejans, L. L. et al., 2018
644	-153.852	70.7255	PG-TES15-T1-1	North Slope	Alaska	73.128		2	27	205	178	P	Fuchs, M et al., 2018
646	-153.849	70.729	PG-TES15-T1-3&4&5&34	North Slope	Alaska	64.2007		4	23	215	192	MP	Fuchs, M et al., 2018
649	-153.845	70.7342	PG-TES15-T1-6	North Slope	Alaska	53.775		1	26	165	139	M	Fuchs, M et al., 2018
651	-153.928	70.7388	PG-TES15-T3-1	North Slope	Alaska	72.52		1	32	205	173	M	Fuchs, M et al., 2018
652	-153.921	70.738	PG-TES15-T3-2	North Slope	Alaska	57.3717		1	34	130	96	P	Fuchs, M et al., 2018
653	-153.912	70.7372	PG-TES15-T3-3	North Slope	Alaska	60.804		1	35	195	160	M	Fuchs, M et al., 2018
654	-153.897	70.7357	PG-TES15-T3-5	North Slope	Alaska	65.5533		1	35	190	155	M	Fuchs, M et al., 2018
655	-153.889	70.7349	PG-TES15-T3-6	North Slope	Alaska	77.155		1	25	195	170	MP	Fuchs, M et al., 2018
656	-138.957	69.5796	PG2150	Herschel Island	Canada	66.7012	sg	2	15	235	220	M	Tanski, G. et al., 2016
658	-139.026	69.5715	PG2152	Herschel Island	Canada	56.5322	sg	2	25	59	34	M	Tanski, G. et al., 2016
660	-139.007	69.5747	PG2155	Herschel Island	Canada	62.0476	sg	1	45	197	152	M	Tanski, G. et al., 2016
661	-138.895	69.5708	PG2156	Herschel Island	Canada	58.1006	sg	1	50	220	170	M	Tanski, G. et al., 2016
662	-138.89	69.5718	PG2157	Herschel Island	Canada	49.3077	sg	1	80	190	110	M	Tanski, G. et al., 2016
663	-138.997	69.5734	PG2159	Herschel Island	Canada	60.4352	sg	1	30	200	170	M	Tanski, G. et al., 2016
664	-138.871	69.5787	PG2163	Herschel Island	Canada	64.497	sg	1	40	225	185	M	Tanski, G. et al., 2016
669	-123	63.367	P7_T35A		Canada	70.0214		1	23	257	234	P	Tarnocai, C. and Bockheim, J. 2011
670	71.9653	71.5963	193-196-YuV	Yamal	Russia	21.6109		4	38	530	492	M	Vasil'chuk, A. C. and Vasil'chuk. Y. K. 2015
671	161.384	68.748	Shuchi Lake Ridge		Russia	43.1579	sg	1	60	100	40	M	Heslop, J. K. et al., 2017
672	159.154	68.63	Duvyanni Yar		Russia	54.023	sg	1	35	215	180	M	Heslop, J. K. et al., 2017
673	161.407	68.897	Tube Dispenser Lake		Russia	47.0588	sg	1	70	120	50	M	Heslop, J. K. et al., 2017
674	161.588	68.724	Rodinka		Russia	49.2958	sg	1	110	190	80	M	Heslop, J. K. et al., 2017
678	-75.7546	62.1031	D1_T1	Salluit	Canada	57.9154	dbd	1	41	255	214	P	Gagnon, S. and Allard, M. 2020
679	-75.7536	62.1113	D4_T1	Salluit	Canada	44.0379	dbd	1	48	183	135	P	Gagnon, S. and Allard, M. 2020
680	-75.7654	62.1218	D5_T1	Salluit	Canada	60.0117	dbd	1	34	144	110	P	Gagnon, S. and Allard, M. 2020
683	72.8843	65.2985	borehole 1-09	Nadym	Russia	37.3703	dbd	1	300	500	200	M	Kukkonen, I. T. et al., 2020
684	72.8691	65.316	borehole 3-09	Nadym	Russia	32.9092	dbd	1	300	500	200	M	Kukkonen, I. T. et al., 2020
686	100.916	37.9978	EB	Qilian mnts.	China	58.6583	sg	1	100	600	500	P	Wang, Q. et al., 2017
687	66.8334	69.7093	36&43&44	Marre Sale	Russia	37.6905	sg	3	100	200	100	M	Oblogov, G. E. et al., 2020
688	66.8143	69.7162	1-4,6	Marre Sale	Russia	46.026	sg	5	100	200	100	M	Oblogov, G. E. et al., 2020
696	132.084	71.3836	PETA-CARB_ID8a-c	Buor Khaya	Russia	37.7005	dbd	5	60	550	490	M	Strauss, J. et al., 2020
698	-152.327	69.3038	PETA-CARB_ID22	Colville R.	Alaska	38.3651	dbd	1	100	560	460	M	Strauss, J. et al., 2020
699	-150.516	69.3404	PETA-CARB_ID23	Itkillik River	Alaska	39.2482	dbd	1	50	540	490	M	Strauss, J. et al., 2020
700	-155.436	69.0326	PETA-CARB_ID20	Colville R.	Alaska	39.1941	dbd	1	350	450	100	M	Strauss, J. et al., 2020
701	-152.853	69.2469	PETA-CARB_ID21	Colville R.	Alaska	39.1578	dbd	1	230	360	130	M	Strauss, J. et al., 2020
702	-147.756	65.0687	PETA-CARB_ID25	Vault Creek	Alaska	38.2965	dbd	1	282	382	100	M	Strauss, J. et al., 2020
703	-108.73	76.2234	Sherard Bay F-34	Melville I.	Canada	42.75		1	55	145	90	M	French, H. M. et al., 1986
704	-135.725	67.176	CB		Canada	80.7853	sg	1	115	305	190	M	Fontaine, M. 2016
705	-133.671	67.852	Lynx 2		Canada	46.7635	sg	1	136	202	66	M	Fontaine, M. 2016
706	-133.754	68.384	NRD		Canada	81.1401	sg	1	136	170	34	M	Fontaine, M. 2016
707	-133.648	67.866	R2T2&3		Canada	48.2138	sg	2	116	223	107	M	Fontaine, M. 2016
708	-135.288	67.464	Wilson		Canada	70.2759	sg	1	175	265	90	M	Fontaine, M. 2016
709	-85.786	79.981	Dump Slump DS-1 & 2		Canada	94.35		2	145	235	90	M	Roy, C. 2018
710	-85.701	79.985	Black Top BT 1 & 2		Canada	64		2	60	210	150	M	Roy, C. 2018
711	171.657	65.525	Borehole 2020-04	Chukotka	Russia	71.5696	sg	1	80	880	800	M	Maslakov, A. A. et al., 2020
712	160.537	55.8909	Borehole 1-06	Kamchatka	Russia	51.2572	sg	1	50	530	480	M	Abramov, A. et al., 2008
713	160.28	55.739	Borehole 7-03	Kamchatka	Russia	49.8838	sg	1	190	630	440	M	Abramov, A. et al., 2008
714	160.277	55.742	Borehole 7-02	Kamchatka	Russia	54.9194	sg	1	180	680	500	M	Abramov, A. et al., 2008
715	160.584	55.931	Borehole 10-04	Kamchatka	Russia	47.0588	sg	1	160	650	490	M	Abramov, A. et al., 2008
716	160.29	55.7507	Borehole 8-03(06)	Kamchatka	Russia	56.0209	sg	1	70	570	500	M	Abramov, A. et al., 2008
717	-77.1995	55.6095	Boreholes 2, 9, 18	Manitounuk	Canada	28.4694		3	57	424	367	M	Allard, M. et al., 1996
718	-79.958	73.158	Gully	Bylot I.	Canada	70.9677	sg	1	40	180	140	MP	Fortier, D. et al., 2007
719	-65.9414	58.6955	Site#1	N. Quebec	Canada	35		1	100	600	500	M	Seguin, M.-K. and Frydecki, J. 1994
720	129.502	62.3155	Neleger	Yakutia	Russia	58.4667		6	120	260	140	M	Iwahana, G. et al., 2005
721	-164.672	65.444	US1&3	Seward Peninsula	Alaska	72.4058		2	59	158	99	MP	Iwahana, G. et al., 2016
723	98.6988	35.0653	Huashixia		China	50.9034	dbd	1	120	760	640	M	Li, D. et al., 2008
725	70.079	73.334	Belyi Island	Belyi Island	Russia	52.4169	sg	2	60	560	500	M	Slagoda, E. A. et al., 2013
726	84.15	33.07	ZK03		China	32.4		1	300	750	450	M	Chen, J. et al., 2016
727	84.21	33.02	ZK09		China	34.5		1	350	700	350	M	Chen, J. et al., 2016
728	85.35	33.21	ZK14		China	25		1	400	600	200	M	Chen, J. et al., 2016
729	85.63	33.39	ZK17		China	11.6		1	400	750	350	M	Chen, J. et al., 2016
730	85.36	33.39	ZK18		China	15.6667		1	350	550	200	M	Chen, J. et al., 2016
731	85.13	33.8	ZK21		China	12.5		1	400	800	400	M	Chen, J. et al., 2016
740	98.6564	49.4903	Sharga		Mongolia	28	sg	1				M	Sharkhuu, A. et al., 2007
741	100.16	50.4333	Hatgal		Mongolia	20	sg	1				M	Sharkhuu, A. et al., 2007
742	99.4231	51.4114	Tsagaan-Nuur		Mongolia	52.6316	sg	1				M	Sharkhuu, A. et al., 2007
743	100.034	49.7883	Burenkhan 1		Mongolia	10	sg	1				M	Sharkhuu, A. et al., 2007
744	99.4975	51.1872	Darhad		Mongolia	45.4545	sg	1				M	Sharkhuu, A. et al., 2007
745	100.032	49.7847	Burenkhan 2		Mongolia	5.26316	sg	1				M	Sharkhuu, A. et al., 2007
746	100.758	51.02	Dalbay		Mongolia	36.5895	sg	1				M	Sharkhuu, A. et al., 2007
747	100.827	51.2858	Turag		Mongolia	29.8796	sg	1				M	Sharkhuu, A. et al., 2007
748	-103.551	78.7867	Isachsen		Canada	68		1	35	100	65	M	Michaelson, G. J. et al., 2008
749	-119.299	76.228	Mould Bay		Canada	67		1	40	100	60	M	Michaelson, G. J. et al., 2008
750	-119.559	73.219	Green Cabin		Canada	18		1	70	100	30	M	Michaelson, G. J. et al., 2008
752	-148.467	70.161	Deadhorse		Alaska	37		1	50	100	50	M	Michaelson, G. J. et al., 2008
753	-148.721	69.675	Franklin Bluffs		Alaska	60		1	60	100	40	M	Michaelson, G. J. et al., 2008
754	-148.673	69.4334	Sagwon nt		Alaska	12		1	60	100	40	M	Michaelson, G. J. et al., 2008
755	-148.696	69.4255	Sagwon at		Alaska	31		1	40	100	60	M	Michaelson, G. J. et al., 2008
756	-148.848	69.1469	Happy Valley		Alaska	84		1	40	100	60	M	Michaelson, G. J. et al., 2008
757	-161.914	59.7399	Quinhagak	Kuskokwim Bay	Alaska	19.0833		2	120	570	450	M	Zheng, M. et al., 2017
761	-138.384	64.6455	KM92		Canada	84.4667		1	10	105	95	MP	Frappier, R. and Lacelle, D. 2021
762	-138.391	64.661	KM93		Canada	88.3109		1	20	85	65	P	Frappier, R. and Lacelle, D. 2021
763	-138.397	64.682	KM95		Canada	86.2763		1	15	105	90	MP	Frappier, R. and Lacelle, D. 2021
765	-69.372	77.4872	QAA2017-14		Greenland	33.4415	dbd	1	250	477	227	M	Ingeman-Nielsen, T. 2020
767	129.654	62.007	Borehole 21		Russia	45.3087	sg	1	400	800	400	MP	Syromyatnikov, I. I. and Kunitsky, V. V. 2019
769	-133.421	62.221	FARO_BH01	Yukon	Canada	91		1	35	268	233	P	Benkert, B.E. et al., 2015a
771	-133.339	62.223	FARO_BH02	Yukon	Canada	63.7143		1	65	135	70	MP	Benkert, B.E. et al., 2015a
773	-133.381	62.226	FARO_BH04	Yukon	Canada	58.0298		1	45	213	168	M	Benkert, B.E. et al., 2015a
775	-133.409	62.1975	FARO_BH05	Yukon	Canada	78.0242		1	57	264	207	P	Benkert, B.E. et al., 2015a
777	-132.438	61.9645	RR_BH02	Yukon	Canada	39.2058		1	200	714	514	M	Benkert, B.E. et al., 2015b
779	-139.846	67.571	BH Site 8	Yukon	Canada	44.9791		1	32	410	378	MP	Benkert, B.E. et al., 2016
781	-139.837	67.572	BH Site 9	Yukon	Canada	50.1365		1	32	443	411	MP	Benkert, B.E. et al., 2016
783	-139.828	67.576	BH Site 11	Yukon	Canada	68.1721		1	34	493	459	MP	Benkert, B.E. et al., 2016
785	-139.847	67.574	BH Site 12 B	Yukon	Canada	57.8098		1	65	308	243	M	Benkert, B.E. et al., 2016
787	-139.824	67.5855	BH Site 16	Yukon	Canada	60.4663		1	47	225	178	M	Benkert, B.E. et al., 2016
789	-139.829	67.593	BH Site 17	Yukon	Canada	51.6012		1	48	290	242	M	Benkert, B.E. et al., 2016
791	-139.917	67.55	BH Site 18	Yukon	Canada	61.0399		1	34	510	476	MP	Benkert, B.E. et al., 2016
793	-138.976	61.354	Burwash 1	Kluane Lake	Canada	42.8293		1	65	147	82	MP	Benkert, B. et al., 2013
795	-138.938	61.3375	Copper Joe 2	Kluane Lake	Canada	49.3		1	78	123	45	M	Benkert, B. et al., 2013
797	-138.843	61.285	Wind farm 1	Kluane Lake	Canada	50.9818		1	110	265	155	M	Benkert, B. et al., 2013
799	-147.831	64.8525	CCHRC T3		Alaska	66.7114	sg	34	100	600	500	MP	Bjella, K. L. et al., 2020
800	7.81785	46.1401	Breithorn		The Alps	0		1				M	Kenner, R. et al., 2019
801	9.94314	46.7469	Fluela 0202		The Alps	0		1				M	Kenner, R. et al., 2019
802	7.27492	46.0966	Les Attelas		The Alps	0		1				M	Kenner, R. et al., 2019
803	8.61043	46.6013	Gemsstock		The Alps	0		1				M	Kenner, R. et al., 2019
804	7.0569	45.9099	Grépillon		The Alps	0		1				M	Kenner, R. et al., 2019
806	-75.643	62.198	FS-9	Quebec	Canada	57.3892	sg	1	70	420	350	M	L'Hérault, E. 2009
808	-77.2867	60.0356	P10_F1&F5	Quebec	Canada	64.0841	sg	2	105	385	280	M	L'Hérault E. et al., 2013
810	-77.2763	60.0349	P10_F3	Quebec	Canada	42.3488	sg	1	55	225	170	M	L'Hérault E. et al., 2013
812	-78.1549	60.8207	A10_F4	Quebec	Canada	45.9662	sg	1	58	322	264	M	L'Hérault E. et al., 2013
814	-78.2081	60.7947	A11_F1	Quebec	Canada	49.3377	sg	1	43	385	342	M	L'Hérault E. et al., 2013
816	-78.1884	60.8078	A10_F8	Quebec	Canada	39.542	sg	1	65	215	150	M	L'Hérault E. et al., 2013
818	-70.0424	60.027	K11-F1	Quebec	Canada	51.448	sg	1	45	238	193	MP	L'Hérault E. et al., 2013
820	-69.9309	58.6943	T11-F3	Quebec	Canada	38.2269	sg	1	64	409	345	M	L'Hérault E. et al., 2013
822	-163.216	61.2575	72B1	Yukon-Kuskokwim delta	Alaska	64.6364		1	65	129.8	64.8	P	Ludwig, S. et al., 2018
824	-163.361	61.292	72B3	Yukon-Kuskokwim delta	Alaska	87.4661		1	65	115	50	P	Ludwig, S. et al., 2018
826	-163.247	61.2585	U1	Yukon-Kuskokwim delta	Alaska	82.4581		1	65	125	60	P	Ludwig, S. et al., 2018
828	-163.237	61.2705	U3	Yukon-Kuskokwim delta	Alaska	87.6294		1	65	118.7	53.7	P	Ludwig, S. et al., 2018
829	-149.49	65.79	Hess Creek		Alaska	73.5484		4	60	235	175	M	Jorgenson, M. T. et al., 2013
830	-145.56	66.45	Twelve-mile Lake		Alaska	42.4167		2	110	210	100	M	Jorgenson, M. T. et al., 2013

## Sheet: GIC n=380
id	x	y	site	region	country	GIC (%)	cores	top (cm)	bottom (cm)	representative sample thickness (cm)	soil material	reference
9	141.705	73.2866	Lyakhovskyi O.	Siberia	Russia	97	1	150	1200	1050	MP	Wetterich, S. et al., 2016
10	143.635	72.672	Oyogos yar	Siberia	Russia	174	1	450	900	450	MP	Wetterich, S. et al., 2016
16	148.155	70.6375	Boydom	Indigirka R Lowlands	Russia	84.9333	2	25	90	65	M	Takano, S. et al., 2019
17	148.264	70.5633	Kryvaya	Indigirka R Lowlands	Russia	165.995	12	25	90	65	M	Takano, S. et al., 2019
18	147.469	70.2519	Verkhny Khatistakh	Indigirka R Lowlands	Russia	83.3456	4	25	90	65	M	Takano, S. et al., 2019
19	147.304	70.5156	Allaikha	Indigirka R Lowlands	Russia	106.35	2	25	90	65	M	Takano, S. et al., 2019
22	-150.871	69.5667	Itkillik	Alaska	Alaska	90.3158	3	35	520	485	M	Kanevskiy, M. et al., 2011
24	-156.706	71.2953	Barrow	Alaska	Alaska	54	1	15	450	435	M	Meyer, H. et al., 2010
26	-150.73	69.251	Arctic foothills AL2	Alaska	Alaska	115.508	6	40	400	360	MP	Trochim, E. D. et al., 2016
27	-150.975	69.3282	Arctic foothills AR6	Alaska	Alaska	179.3	2	50	200	150	MP	Trochim, E. D. et al., 2016
29	126.265	70.3436	Kurungnakh (Lena delta)	Sakha Republic	Russia	80.6667	15	100	600	500	MP	Wetterich, S. et al., 2008
30	159.216	68.6291	Duvanny var (DY-04)	Sakha Republic	Russia	92	1	30	360	330	M	Wetterich, S. et al., 2011
31	159.141	68.6307	Duvanny var (DY-05)	Sakha Republic	Russia	53.47	1	130	630	500	M	Wetterich, S. et al., 2011
32	159.088	68.6328	Duvanny var (DY-01)	Sakha Republic	Russia	55.43	1	75	575	500	M	Wetterich, S. et al., 2011
34	-157.036	65.2556	Finger lake	Alaska	Alaska	473.643	2	45	350	305	P	Kanevskiy, M. et al., 2014
36	-157.639	65.1972	Two lakes	Alaska	Alaska	493.075	3	45	480	435	P	Kanevskiy, M. et al., 2014
38	-157.725	63.575	Innoko flats	Alaska	Alaska	180.927	3	60	550	490	P	Kanevskiy, M. et al., 2014
40	-138.878	69.5755	Herschel Island	Yukon	Canada	115.436	5	30	165	135	M	Kokelj, S. V. et al., 2012
41	-134.585	69.4808	Richards Island	NW Territories	Canada	62.75	26	100	225	125	M	O’Neill, H. B. and Burn, C. R. 2012
42	172.219	67.4407	Elgygytgyn	Chukchi Peninsula	Russia	40	2	40	500	460	M	Schwamborn, G. et al., 2006
43	-156.59	71.3079	Barrow (ag)	Alaska	Alaska	160.572	4	28	113	85	M	Munroe, J. S. et al., 2007
44	-156.423	71.0733	Barrow (per)	Alaska	Alaska	162.421	5	22	105	83	M	Munroe, J. S. et al., 2007
45	-164.307	66.5828	Kit-1&PETA_CARB_ID19	Alaska	Alaska	34.8559	2	150	650	500	M	Wetterich, S. et al., 2012
46	-148.897	65.5533	Dalton highway CD-4	Alaska	Alaska	76.5121	4	71	550	479	M	Kanevskiy, M. et al., 2012
48	-148.894	65.5486	Dalton highway(section 2 ja 3)	Alaska	Alaska	80	13	50	1700	1650	M	Kanevskiy, M. et al., 2012
49	-148.876	65.5375	Dalton highway(section 4)	Alaska	Alaska	63	15	50	400	350	M	Kanevskiy, M. et al., 2012
50	-140.415	69.588	Komakuk beach	Yukon	Canada	105.442	3	70	460	390	MP	Fritz, M. et al., 2012
51	-139.013	69.5679	Herschel Island	Yukon	Canada	140	1	40	590	550	MP	Fritz, M. et al., 2012
53	136.08	74.06	Stolbovoy Island	Sakha Republic	Russia	50	1	80	180	100	M	Schirrmeister, L. et al., 2003
54	135.587	75.366	Kotelny Island	Sakha Republic	Russia	80	1	160	270	110	M	Schirrmeister, L. et al., 2003
55	138.454	74.7334	Kotelny Island	Sakha Republic	Russia	78	1	150	800	650	M	Schirrmeister, L. et al., 2003
56	142.161	74.8694	Bunge land (high)	Sakha Republic	Russia	23	1	150	300	150	M	Schirrmeister, L. et al., 2003
57	140.387	74.8392	Bunge land (low)	Sakha Republic	Russia	35	1	20	50	30	M	Schirrmeister, L. et al., 2003
58	146.648	75.1193	Island Novaya Sibir	Sakha Republic	Russia	59	1	120	1080	960	M	Schirrmeister, L. et al., 2003
59	140.351	74.246	Maly Lyakhovsky Island	Sakha Republic	Russia	87	1	210	500	290	M	Schirrmeister, L. et al., 2003
60	143.551	72.6753	Oyogos yar	Sakha Republic	Russia	64	1	240	640	400	M	Schirrmeister, L. et al., 2003
61	123.799	72.974	Turakh-Sise (Lena delta)	Sakha Republic	Russia	26.0625	1	164	640	476	M	Schirrmeister, L. et al., 2007
62	124.181	72.9402	Khardang-Sise (Lena delta)	Sakha Republic	Russia	44.075	2	40	500	460	MP	Schirrmeister, L. et al., 2007
63	117.142	73.6088	Cape Mamontov Klyk profiles1&2	Sakha Republic	Russia	95	2	100	2600	2500	MP	Schirrmeister, L. et al., 2008
64	116.875	73.637	Cape Mamontov Klyk (Mak-14)	Sakha Republic	Russia	87	1	50	250	200	M	Schirrmeister, L. et al., 2008
89	-20.549	74.472	Zackenberg (c1)	Greenland	Greenland	33	1	100	600	500	M	Gilbert, G. L. et al. 2017
90	-20.56	74.4685	Zackenberg (c2)	Greenland	Greenland	27	1	100	600	500	M	Gilbert, G. L. et al. 2017
91	11.8444	78.9383	Knudsenheia	Svalbard	Norway	15	1	80	300	220	M	Schwamborn, G. et al., 2008
92	12.1014	78.9089	Midre Lovenbreen	Svalbard	Norway	10	1	80	310	230	M	Schwamborn, G. et al., 2008
93	57.6297	68.762	Pesyakov Island	Nenets	Russia	14.7833	3	300	600	300	M	Le, T. M. H. et al., 2018
94	-149.543	61.3812	Anchorage	Alaska	Alaska	36.5582	3	350	800	450	M	Kanevskiy, M. et al., 2013a
95	18.9733	68.3473	Storflaket	Abisko	Sweden	76.4	1	70	250	180	P	Väisänen, M. et al., 2020
96	74.8233	63.1611	N-1	W Siberian peatlands	Russia	666.438	1	27	232	205	P	Smith, L. C. et al., 2012
98	76.5356	63.1406	N-10	W Siberian peatlands	Russia	480.484	1	38	100	62	P	Smith, L. C. et al., 2012
99	76.8167	63.4999	N-12	W Siberian peatlands	Russia	562.483	1	38	210	172	P	Smith, L. C. et al., 2012
100	76.6427	63.7707	N-13	W Siberian peatlands	Russia	373.834	1	28	159	131	P	Smith, L. C. et al., 2012
101	75.5108	63.7721	N-14	W Siberian peatlands	Russia	386.951	1	38	80	42	P	Smith, L. C. et al., 2012
102	74.2693	63.65	N-15	W Siberian peatlands	Russia	1104.84	1	38	209	171	P	Smith, L. C. et al., 2012
103	75.5319	64.4962	N-16	W Siberian peatlands	Russia	756.049	1	38	80	42	P	Smith, L. C. et al., 2012
104	74.9867	64.072	N-17	W Siberian peatlands	Russia	197.356	1	38	120	82	P	Smith, L. C. et al., 2012
105	75.2172	62.8526	N-18	W Siberian peatlands	Russia	917.799	1	38	69	31	P	Smith, L. C. et al., 2012
106	74.2628	62.9579	N-19	W Siberian peatlands	Russia	759.417	1	38	200	162	P	Smith, L. C. et al., 2012
107	76.6791	66.4611	E-101	W Siberian peatlands	Russia	874.503	1	38	250	212	P	Smith, L. C. et al., 2012
108	76.5932	66.0411	E-102	W Siberian peatlands	Russia	632.285	1	39	110	71	P	Smith, L. C. et al., 2012
109	76.4845	66.7441	E-103	W Siberian peatlands	Russia	743.145	1	29	230	201	P	Smith, L. C. et al., 2012
110	77.3454	65.9984	E-106	W Siberian peatlands	Russia	587.036	1	39	60	21	P	Smith, L. C. et al., 2012
111	75.855	66.0085	E-107	W Siberian peatlands	Russia	699.543	1	39	77	38	P	Smith, L. C. et al., 2012
112	75.2898	65.8587	E-108	W Siberian peatlands	Russia	785.899	1	39	143	104	P	Smith, L. C. et al., 2012
113	76.9943	66.4698	E-110	W Siberian peatlands	Russia	584.285	1	29	213	184	P	Smith, L. C. et al., 2012
114	79.1379	66.1994	E-111&E-112	W Siberian peatlands	Russia	1716.79	2	39	400	361	P	Smith, L. C. et al., 2012
116	79.3234	66.4497	E-113	W Siberian peatlands	Russia	841.53	1	39	328	289	P	Smith, L. C. et al., 2012
117	75.4346	67.8094	E-115	W Siberian peatlands	Russia	309.926	1	29	99	70	P	Smith, L. C. et al., 2012
119	75.5025	65.4998	E-119	W Siberian peatlands	Russia	748.216	1	39	320	281	P	Smith, L. C. et al., 2012
120	77.9605	65.6079	E-120	W Siberian peatlands	Russia	569.861	1	39	70	31	P	Smith, L. C. et al., 2012
121	73.0058	65.5831	D-122	W Siberian peatlands	Russia	543.342	1	49	100	51	P	Smith, L. C. et al., 2012
122	71.0309	64.4224	D-123	W Siberian peatlands	Russia	615.87	1	49	110	61	P	Smith, L. C. et al., 2012
123	72.9697	65.0842	D-124	W Siberian peatlands	Russia	462.499	1	39	88	49	P	Smith, L. C. et al., 2012
124	72.1616	64.5227	D-125	W Siberian peatlands	Russia	720.237	1	29	220	191	P	Smith, L. C. et al., 2012
125	70.2948	64.3068	D-127	W Siberian peatlands	Russia	963.051	1	59	220	161	P	Smith, L. C. et al., 2012
126	72.4631	65.55	D-128	W Siberian peatlands	Russia	1366.63	1	39	220	181	P	Smith, L. C. et al., 2012
127	73.7471	66.6085	P-129	W Siberian peatlands	Russia	740.163	1	29	270	241	P	Smith, L. C. et al., 2012
128	74.5306	66.8689	P-130	W Siberian peatlands	Russia	602.675	1	39	80	41	P	Smith, L. C. et al., 2012
129	73.9888	66.1664	P-131	W Siberian peatlands	Russia	487.72	1	31	134	103	P	Smith, L. C. et al., 2012
130	73.9488	66.4997	P-132	W Siberian peatlands	Russia	634.457	1	49	81	32	P	Smith, L. C. et al., 2012
131	74.3478	65.7933	P-133	W Siberian peatlands	Russia	1085.8	1	49	430	381	P	Smith, L. C. et al., 2012
133	75.3611	64.1476	G-136	W Siberian peatlands	Russia	590.213	1	49	160	111	P	Smith, L. C. et al., 2012
134	75.7661	63.7504	G-137	W Siberian peatlands	Russia	933.592	1	51	178	127	P	Smith, L. C. et al., 2012
135	76.6731	64.5168	G-138	W Siberian peatlands	Russia	1028.6	1	59	136	77	P	Smith, L. C. et al., 2012
137	79.5476	64.2709	G-140	W Siberian peatlands	Russia	479.873	1	49	119	70	P	Smith, L. C. et al., 2012
140	-114.278	62.5058	B1A&B1B&B1C	Yellowknife	Canada	41.8497	3	70	360	290	M	Wolfe, S. A. et al. 2011
143	-114.117	62.6026	HSB1A&HST1A&6	Yellowknife	Canada	127.436	2	20	350	330	M	Wolfe, S. A. et al. 2011
144	-114.113	62.6052	B2A&MS1A&BS1A&5&7	Yellowknife	Canada	57.9745	11	40	350	310	M	Wolfe, S. A. et al. 2011
147	-114.531	62.4563	PS1A&PS1B&UB-1	Yellowknife	Canada	723.835	3	40	300	260	P	Wolfe, S. A. et al. 2011
148	-114.225	62.5045	MS2A	Yellowknife	Canada	41.3281	1	30	300	270	M	Wolfe, S. A. et al. 2011
149	-114.016	62.5541	PC1A	Yellowknife	Canada	411.965	1	40	500	460	P	Wolfe, S. A. et al. 2011
151	-113.998	62.556	MST1A	Yellowknife	Canada	44.8512	1	40	140	100	M	Wolfe, S. A. et al. 2011
152	-113.358	62.5414	ST10-07	Yellowknife	Canada	207.304	1	40	298	258	P	Wolfe, S. A. et al. 2011
153	-154.484	70.7549	PG-IKP15-T1-0&T1-1	Ikpikpuk R delta	Alaska	45.5433	2	85	195	110	M	Fuchs, M. et al., 2018
155	-154.482	70.7535	PG-IKP15-T1-2&T1-3	Ikpikpuk R delta	Alaska	61.9058	2	50	195	145	M	Fuchs, M. et al., 2018
157	-154.436	70.7914	PG-IKP-DELT-1	Ikpikpuk R delta	Alaska	151.297	1	69	200	131	MP	Fuchs, M. et al., 2018
158	-151.383	70.348	PG-FCR-DELT-2	Fish Creek R Delta	Alaska	70.5527	1	69	120	51	MP	Fuchs, M. et al., 2018
159	-151.344	70.3739	PG-FCR-DELT-3	Fish Creek R Delta	Alaska	188.224	1	69	104	35	MP	Fuchs, M. et al., 2018
160	-151.339	70.3858	PG-FCR-DELT-5a	Fish Creek R Delta	Alaska	178.252	1	69	157	88	MP	Fuchs, M. et al., 2018
172	-148.902	65.5556	AUTC08-5&7&8	Interior Alaska	Alaska	78.117	3	59	510	451	M	Shur, Y. et al., 2010
175	-148.91	65.5586	AUTC08-8	Interior Alaska	Alaska	126.665	1	35	500	465	M	Shur, Y. et al., 2010
186	-156.336	71.2594	BSC02	Beaufort Sea Coast	Alaska	229.761	1	30	220	190	M	Kanevskiy, M. et al., 2013b
187	-155.926	71.2115	BSC03	Beaufort Sea Coast	Alaska	188.508	1	45	110	65	M	Kanevskiy, M. et al., 2013b
188	-155.592	71.0478	BSC04	Beaufort Sea Coast	Alaska	202.158	1	45	145	100	M	Kanevskiy, M. et al., 2013b
190	-155.997	70.8949	BSC06	Beaufort Sea Coast	Alaska	17.1705	1	45	190	145	M	Kanevskiy, M. et al., 2013b
191	-155.88	70.8253	BSC08	Beaufort Sea Coast	Alaska	140.961	1	47	108	61	M	Kanevskiy, M. et al., 2013b
192	-155.485	70.8737	BSC10	Beaufort Sea Coast	Alaska	176.081	1	45	170	125	M	Kanevskiy, M. et al., 2013b
193	-155.24	71.0574	BSC11	Beaufort Sea Coast	Alaska	319.47	1	45	205	160	M	Kanevskiy, M. et al., 2013b
194	-155.068	71.0765	BSC12	Beaufort Sea Coast	Alaska	394.46	1	45	110	65	M	Kanevskiy, M. et al., 2013b
195	-154.532	70.8201	BSC15	Beaufort Sea Coast	Alaska	439.518	1	65	213	148	M	Kanevskiy, M. et al., 2013b
196	-154.177	70.7681	BSC16	Beaufort Sea Coast	Alaska	299.283	1	45	270	225	M	Kanevskiy, M. et al., 2013b
197	-153.338	70.8932	BSC17	Beaufort Sea Coast	Alaska	125.704	1	50	230	180	M	Kanevskiy, M. et al., 2013b
198	-152.882	70.8558	BSC18	Beaufort Sea Coast	Alaska	196.295	1	35	222	187	M	Kanevskiy, M. et al., 2013b
199	-152.522	70.8708	BSC19	Beaufort Sea Coast	Alaska	201.665	1	40	223	183	M	Kanevskiy, M. et al., 2013b
200	-152.382	70.7157	BSC20	Beaufort Sea Coast	Alaska	174.127	1	26	210	184	M	Kanevskiy, M. et al., 2013b
201	-152.298	70.6021	BSC21	Beaufort Sea Coast	Alaska	143.293	1	60	145	85	M	Kanevskiy, M. et al., 2013b
202	-152.538	70.5755	BSC22	Beaufort Sea Coast	Alaska	205.752	1	48	355	307	M	Kanevskiy, M. et al., 2013b
203	-152.088	70.5474	BSC23	Beaufort Sea Coast	Alaska	385.211	1	60	165	105	M	Kanevskiy, M. et al., 2013b
205	-151.617	70.4347	BSC25	Beaufort Sea Coast	Alaska	21.7078	1	185	230	45	M	Kanevskiy, M. et al., 2013b
206	-150.939	70.4333	BSC27	Beaufort Sea Coast	Alaska	223.776	1	40	165	125	M	Kanevskiy, M. et al., 2013b
207	-150.105	70.4236	BSC29A	Beaufort Sea Coast	Alaska	274.814	1	60	125	65	M	Kanevskiy, M. et al., 2013b
208	-150.094	70.4333	BSC29B	Beaufort Sea Coast	Alaska	287.039	1	55	164	109	M	Kanevskiy, M. et al., 2013b
209	-149.439	70.5042	BSC30	Beaufort Sea Coast	Alaska	20.4815	1	40	185	145	M	Kanevskiy, M. et al., 2013b
210	-149.026	70.4505	BSC31	Beaufort Sea Coast	Alaska	35.259	1	50	185	135	M	Kanevskiy, M. et al., 2013b
211	-148.701	70.4049	BSC32	Beaufort Sea Coast	Alaska	126.54	1	50	220	170	M	Kanevskiy, M. et al., 2013b
212	-147.994	70.2671	BSC34	Beaufort Sea Coast	Alaska	47.3129	1	80	247	167	M	Kanevskiy, M. et al., 2013b
213	-147.744	70.2184	BSC35	Beaufort Sea Coast	Alaska	144.596	1	16	152	136	M	Kanevskiy, M. et al., 2013b
214	-147.221	70.1654	BSC36	Beaufort Sea Coast	Alaska	838.219	1	60	122	62	M	Kanevskiy, M. et al., 2013b
215	-146.183	70.1622	BSC38	Beaufort Sea Coast	Alaska	300.927	1	50	105	55	M	Kanevskiy, M. et al., 2013b
216	-145.81	70.1451	BSC39	Beaufort Sea Coast	Alaska	166.75	1	40	140	100	M	Kanevskiy, M. et al., 2013b
217	-145.535	70.0575	BSC40	Beaufort Sea Coast	Alaska	172.12	1	78	258	180	M	Kanevskiy, M. et al., 2013b
218	-145.151	69.9894	BSC40B	Beaufort Sea Coast	Alaska	157.141	1	41	164	123	M	Kanevskiy, M. et al., 2013b
219	-144.939	69.9295	BSC41	Beaufort Sea Coast	Alaska	95.7633	1	30	75	45	M	Kanevskiy, M. et al., 2013b
220	-144.672	69.9648	BSC41B	Beaufort Sea Coast	Alaska	103.707	1	100	265	165	M	Kanevskiy, M. et al., 2013b
221	-144.483	70.0164	BSC42	Beaufort Sea Coast	Alaska	4.38957	1	45	100	55	M	Kanevskiy, M. et al., 2013b
222	-144.019	70.0607	BSC43	Beaufort Sea Coast	Alaska	19.6492	1	40	165	125	M	Kanevskiy, M. et al., 2013b
223	-143.671	70.0823	BSC44	Beaufort Sea Coast	Alaska	298.358	1	41	117	76	M	Kanevskiy, M. et al., 2013b
224	-143.315	70.1081	BSC45	Beaufort Sea Coast	Alaska	32.6863	1	135	220	85	M	Kanevskiy, M. et al., 2013b
225	-142.723	70.0356	BSC46	Beaufort Sea Coast	Alaska	237.784	1	45	180	135	M	Kanevskiy, M. et al., 2013b
226	-142.505	69.9521	BSC47	Beaufort Sea Coast	Alaska	74.9974	1	40	101	61	M	Kanevskiy, M. et al., 2013b
227	-141.724	69.7773	BSC49	Beaufort Sea Coast	Alaska	52.8299	1	67	210	143	M	Kanevskiy, M. et al., 2013b
228	-141.196	69.6829	BSC50	Beaufort Sea Coast	Alaska	145.447	1	62	208	146	M	Kanevskiy, M. et al., 2013b
230	-151.074	70.4115	COL3-2	Beaufort Sea Coast	Alaska	197.072	1	70	207	137	M	Kanevskiy, M. et al., 2013b
276	-164.619	66.2894	DM1-15 (lake basin)	Seward Peninsula	Alaska	81.5558	1	75	200	125	MP	Shur, Y. et al., 2012
277	-156.714	71.295	BW-HC1-3	Barrow	Alaska	163.902	3	60	300	240	MP	Kanevskiy, M. et al., 2017
278	-148.423	70.2292	PB-HC1-3	Prudhoe Bay	Alaska	203.496	3	50	200	150	P	Kanevskiy, M. et al., 2017
281	-148.471	70.2232	T1&2 polygon centres	Prudhoe Bay	Alaska	168.067	12	60	200	140	MP	Walker, D. A. et al., 2015
286	93.08	35.198	QT5	Wudaoling2	Tibetan Plateau	23.485	1	170	220	50	MP	Wang, W. et al., 2019
290	130.474	61.7597	YED1	Yukechi Alas, C Yakutia	Russia	59.5122	1	198	691	493	MP	Windrisch, T. et al., 2019
292	-110.236	64.5999	1005&2004	Slave Geol. Province, N.W.T.	Canada	234.681	2	75	349	274	P	Subedi, R. et al., 2020
293	-110.233	64.6037	1006&1007	Slave Geol. Province, N.W.T.	Canada	227.568	2	42	440	398	P	Subedi, R. et al., 2020
295	-110.443	64.7015	1009&2011&2012&2015	Slave Geol. Province, N.W.T.	Canada	90.9986	4	57	360	303	M	Subedi, R. et al., 2020
296	-110.44	64.7027	1010&2019	Slave Geol. Province, N.W.T.	Canada	95.6839	2	15	500	485	M	Subedi, R. et al., 2020
297	-110.735	64.6254	1014	Slave Geol. Province, N.W.T.	Canada	462.041	1	403	885	482	M	Subedi, R. et al., 2020
299	-110.233	64.5966	2005&2006	Slave Geol. Province, N.W.T.	Canada	123.37	2	185	420	235	M	Subedi, R. et al., 2020
301	-110.185	64.6003	2008&2028&2029	Slave Geol. Province, N.W.T.	Canada	30.5476	3	120	624	504	M	Subedi, R. et al., 2020
304	-110.45	64.7028	2013	Slave Geol. Province, N.W.T.	Canada	37.86	1	180	250	70	M	Subedi, R. et al., 2020
306	-110.436	64.7136	2018	Slave Geol. Province, N.W.T.	Canada	119.029	1	30	280	250	M	Subedi, R. et al., 2020
310	-110.215	64.6055	2033	Slave Geol. Province, N.W.T.	Canada	200.395	1	262	510	248	M	Subedi, R. et al., 2020
327	147.484	70.8308	AWI_12Kyt-0807-1		Russia	109.394	1	37	70	33	M	Schirrmeister, L. et al., 2018
328	160.939	69.095	AWI_12P-1707-1 & 1907-2 & 1607-1		Russia	280.831	3	41	125	84	P	Schirrmeister, L. et al., 2018
329	161.002	69.1038	AWI_12P-2107-2 & 1		Russia	527.446	2	34	105	71	P	Schirrmeister, L. et al., 2018
331	95.3628	52.53	Merzlyi Yar	Bolshoi Yenisei R.	Russia	60	1	150	150	0	M	Alexeev, S. et al., 2007
333	126.288	72.3333	Bkh1	Kurungnakh/	Russia	20.182	1	700	1200	500	M	Schirrmeister, L. et al., 2017a
334	126.311	72.3453	Bkh2	Kurungnakh/Bkh2	Russia	109.287	1	300	380	80	MP	Schirrmeister, L. et al., 2017a
335	123.212	72.8803	Nag4-50	Nagym/Nag4-50	Russia	72.7353	2	40	440	400	MP	Schirrmeister, L. et al., 2017b
337	123.206	72.8792	Nag1-80	Nagym/Nag1-80	Russia	91.5	1	100	600	500	MP	Schirrmeister, L. et al., 2017b
338	129.415	71.7834	Byk_98_Mkh	Bykovsky Peninsula	Russia	94.2273	1	70	400	330	M	Schirrmeister, L. et al., 2020
355	-67.6181	76.0329	GL3	Thule	Greenland	80.3521	1	20	318	298	P	Wetterich, S. et al., 2019
356	-70.041	76.5691	SI1	Saunders Island	Greenland	69.249	1	10	198	188	P	Wetterich, S. et al., 2019
357	-127.319	65.4024	Billy Creek North 01	S Mackenzie corridor	Canada	22.3909	1	90	560	470	M	Smith, S. L. et al., 2009
358	-128.284	65.8958	Chick Lake 01	S Mackenzie corridor	Canada	80.4588	1	50	550	500	M	Smith, S. L. et al., 2009
359	-127.621	65.5204	Elliot Creek 01&02	S Mackenzie corridor	Canada	41.5734	2	110	580	470	M	Smith, S. L. et al., 2009
361	-122.405	62.3166	Ebbutt Hill 01	S Mackenzie corridor	Canada	58.475	1	30	315	285	M	Smith, S. L. et al., 2009
362	-127.888	65.7473	Gibson Lake 01	S Mackenzie corridor	Canada	23.1941	1	120	590	470	M	Smith, S. L. et al., 2009
363	-127.834	65.6697	Hanna River 01	S Mackenzie corridor	Canada	84.8538	1	90	500	410	M	Smith, S. L. et al., 2009
364	-128.469	66.2849	Jackfish Creek 02	S Mackenzie corridor	Canada	19.3	1	60	550	490	M	Smith, S. L. et al., 2009
365	-124.732	64.4278	Little Smith Creek 02	S Mackenzie corridor	Canada	23.9667	1	100	420	320	M	Smith, S. L. et al., 2009
366	-127.438	65.4366	Oscar Creek 01	S Mackenzie corridor	Canada	45.8471	1	80	550	470	M	Smith, S. L. et al., 2009
367	-124.838	64.6523	Old Fort Point 01	S Mackenzie corridor	Canada	32.25	1	100	300	200	M	Smith, S. L. et al., 2009
368	-123.18	62.931	River between Two Mountains 02	S Mackenzie corridor	Canada	33.2667	1	100	320	220	M	Smith, S. L. et al., 2009
369	-128.351	66.0019	Snafu Creek 01	S Mackenzie corridor	Canada	54.1429	1	150	550	400	M	Smith, S. L. et al., 2009
370	-124.485	64.2879	Saline River 02	S Mackenzie corridor	Canada	24.4	1	100	520	420	M	Smith, S. L. et al., 2009
371	-126.137	65.0981	Vermillion Creek 01	S Mackenzie corridor	Canada	44.9833	1	60	520	460	M	Smith, S. L. et al., 2009
372	-126.127	65.0954	Vermillion Creek 02	S Mackenzie corridor	Canada	52.2077	1	30	430	400	MP	Smith, S. L. et al., 2009
373	-123.084	62.7134	Willowlake River 01	S Mackenzie corridor	Canada	28.7	1	250	270	20	M	Smith, S. L. et al., 2009
374	-114.288	62.4958	1&2	North Slave, Yellowknife	Canada	43.1328	8	100	200	100	M	Paul, J. R. et al., 2020
376	-114.326	62.5247	3	North Slave, Yellowknife	Canada	52.3299	4	100	200	100	M	Paul, J. R. et al., 2020
377	-114.057	62.5776	4	North Slave, Yellowknife	Canada	56.5152	4	100	200	100	M	Paul, J. R. et al., 2020
381	-114.225	62.5082	8	North Slave, Yellowknife	Canada	44.2087	4	100	200	100	M	Paul, J. R. et al., 2020
382	-114.313	62.5274	9	North Slave, Yellowknife	Canada	72.0737	4	100	200	100	M	Paul, J. R. et al., 2020
383	-114.986	62.5422	10	North Slave, Yellowknife	Canada	51.9033	3	100	200	100	M	Paul, J. R. et al., 2020
384	-114.975	62.535	11	North Slave, Yellowknife	Canada	53.2074	3	100	200	100	M	Paul, J. R. et al., 2020
385	-114.965	62.53	12&13&Boundary Creek	North Slave, Yellowknife	Canada	47.6613	11	100	200	100	M	Paul, J. R. et al., 2020
387	-114.127	62.5977	14	North Slave, Yellowknife	Canada	34.8438	4	100	200	100	M	Paul, J. R. et al., 2020
388	-114.116	62.5957	15	North Slave, Yellowknife	Canada	38.953	4	100	200	100	M	Paul, J. R. et al., 2020
389	-115.012	62.5539	16	North Slave, Yellowknife	Canada	90.7587	3	100	200	100	M	Paul, J. R. et al., 2020
390	-114.307	62.4713	17	North Slave, Yellowknife	Canada	81.6779	2	100	200	100	M	Paul, J. R. et al., 2020
391	-114.313	62.4981	18	North Slave, Yellowknife	Canada	71.6072	2	100	200	100	M	Paul, J. R. et al., 2020
392	-114.971	62.5337	19	North Slave, Yellowknife	Canada	36.7637	3	100	200	100	M	Paul, J. R. et al., 2020
393	-114.89	62.5186	20	North Slave, Yellowknife	Canada	175.496	4	100	200	100	MP	Paul, J. R. et al., 2020
414	-85.8959	79.9984	Eur1	Ellesmere Island	Canada	21.3	1	70	970	900	M	Steven, B. et al., 2007
415	-85.8394	80.0005	Eur3	Ellesmere Island	Canada	38.0333	1	100	400	300	M	Steven, B. et al., 2008
417	-140.833	62.3333	Beaver Creek	Beaver Creek	Canada	91.9825	1	48	276	228	MP	Stephani, E. et al., 2010
418	147.495	70.8615	11-KH-2807	Kytalyk	Russia	58.4636	1	100	400	300	M	Schirrmeister, L. et al., 2012
438	-139.317	64.0319	DC_BH02	Dawson City	Canada	55.7287	1	55	305	250	M	Benkert, B. E. et al., 2015c
439	-139.443	64.0836	DC_BH03	Dawson City	Canada	88.2857	1	30	410	380	M	Benkert, B. E. et al., 2015c
440	-139.482	64.0449	DC_BH04	Dawson City	Canada	98.2351	2	43	445	402	M	Benkert, B. E. et al., 2015c
442	-139.426	64.0682	DC_BH08	Dawson City	Canada	68.4326	1	80	515	435	M	Benkert, B. E. et al., 2015c
456	-140.408	62.1152	BH16	Beaver Creek	Canada	129.493	1	59	206	147	M	Pumple, J. 2016
457	-140.708	62.2691	BH15	Beaver Creek	Canada	211.149	1	42	300	258	M	Pumple, J. 2016
458	-140.457	62.1683	BH17	Beaver Creek	Canada	149.48	1	53	274	221	M	Pumple, J. 2016
459	-140.476	62.1828	BH18	Beaver Creek	Canada	136.399	1	53	308	255	M	Pumple, J. 2016
460	-140.491	62.1895	BH19	Beaver Creek	Canada	145.307	1	42	261	219	M	Pumple, J. 2016
461	-140.509	62.2069	BH20	Beaver Creek	Canada	124.232	1	81	477	396	M	Pumple, J. 2016
462	-140.889	62.5101	BH11	Beaver Creek	Canada	141.072	1	100	590	490	MP	Pumple, J. 2016
463	-140.977	62.5514	BH12E&	Beaver Creek	Canada	103.084	4	40	586	546	M	Pumple, J. 2016
464	-140.973	62.5559	BH12E&BH12&BH12B	Beaver Creek	Canada	137.456	3	41	583	542	MP	Pumple, J. 2016
467	-140.578	62.3421	BH13B	Beaver Creek	Canada	380.686	1	61	282	221	P	Pumple, J. 2016
480	63.6515	67.2964	BP-1	Vorkuta	Russia	125.5	1	110	150	40	P	Budantseva, N. A. et al., 2015
481	107.333	47.75	Nalaikh	Nalaikh	Mongolia	8	1	400	600	200	M	Wu, T. et al., 2009
482	-124.466	64.2802	Unburnt	Central Mackenzie Valley	Canada	64.5	1	130	150	20	M	Smith, S. L. et al., 2015
483	-135.217	60.5	palsa 10	Yukon	Canada	87.5	1	40	124	84	M	Coultis, T. L. and Lewkowicz, A. G. 2003
484	-161.313	67.8583	BIMU-E1	Maiymerak Mtns.	Alaska	14.332	1	100	125	25	M	Jorgenson, T. 2013
485	-161.965	67.9273	GT1-e1 & e2	Lake Mapsa	Alaska	33.7747	2	80	405	325	M	Jorgenson, T. 2013
486	-162.357	67.9431	GT2-e1 & e2	Lake Mapsa	Alaska	123.417	2	60	505	445	M	Jorgenson, T. 2013
487	-149.544	68.526	GTH89-e1	Toolik Lake	Alaska	73.9787	1	80	400	320	M	Jorgenson, T. 2013
488	-150.314	68.9607	HORN-e1	Horn Lake	Alaska	84.7146	1	47	100	53	M	Jorgenson, T. 2013
489	-149.576	68.5555	IMN1-e2	I-minus 1 Lake	Alaska	104.84	1	50	300	250	M	Jorgenson, T. 2013
490	-149.523	68.5434	IMN2-e1	I-minus 1 Lake	Alaska	155.377	1	20	80	60	M	Jorgenson, T. 2013
491	-149.818	68.6659	ITK2-e1&e2	Itkillik River	Alaska	79.8905	2	60	135	75	M	Jorgenson, T. 2013
492	-150.556	68.8793	ITK5-e1	Nanushuk River	Alaska	79.163	1	20	510	490	M	Jorgenson, T. 2013
493	-149.578	68.8713	KTK1-e1 & e2	Kuparuk R. tributary	Alaska	199.432	2	40	255	215	MP	Jorgenson, T. 2013
494	-150.74	68.9107	NANU-p1	Nanushuk River	Alaska	80.5641	1	19	100	81	M	Jorgenson, T. 2013
495	-149.622	68.6794	NE14-e1	Toolik Lake	Alaska	29.3883	1	15	145	130	M	Jorgenson, T. 2013
496	-159.294	68.0358	OK2-e1	Okoklik Lake	Alaska	80.194	1	40	455	415	M	Jorgenson, T. 2013
497	-161.42	67.9255	Slope-e1	Maiymerak Mtns.	Alaska	85.1313	1	100	265	165	M	Jorgenson, T. 2013
498	-150.668	68.9621	VTK-p1	Nanushuk River	Alaska	67.448	1	23	95	72	M	Jorgenson, T. 2013
499	-161.406	67.7347	WOCR-e1	Eli River	Alaska	19.5208	1	60	125	65	M	Jorgenson, T. 2013
510	-156.41	71.2401	B1-CHRONO-CPW-7	North Slope	Alaska	147.408	1	33	215	182	MP	Kanevskiy, M. et al., 2020a
511	-156.478	71.2288	B2-HSDO-CPW-4	North Slope	Alaska	97.473	1	70	124	54	MP	Kanevskiy, M. et al., 2020a
512	-156.698	71.2907	B3-CHRONO-CPW-5	North Slope	Alaska	134.548	1	33	120	87	MP	Kanevskiy, M. et al., 2020a
513	-156.661	71.2771	B4-CHRONO-CPW-1	North Slope	Alaska	86.6903	1	36	92	56	MP	Kanevskiy, M. et al., 2020a
514	-153.828	70.7305	T1-CHRONO-CPC-1	North Slope	Alaska	191.723	1	48	179	131	MP	Kanevskiy, M. et al., 2020a
515	-153.642	70.7399	T2-CHRONO-CPC-2	North Slope	Alaska	70.654	1	59	129	70	MP	Kanevskiy, M. et al., 2020a
516	-153.749	70.7543	T3-CHRONO-CPC-6	North Slope	Alaska	110.328	1	45	157	112	M	Kanevskiy, M. et al., 2020a
517	-154	70.7885	T4-CHRONO-CPC-3	North Slope	Alaska	70.7371	1	66	114	48	M	Kanevskiy, M. et al., 2020a
518	-153.952	70.7486	T5-CHRONO-CPC-7	North Slope	Alaska	129.628	1	55	147	92	M	Kanevskiy, M. et al., 2020a
519	-153.92	70.7466	T6-CHRONO-CPC-8	North Slope	Alaska	145.461	1	58	128	70	M	Kanevskiy, M. et al., 2020a
521	-153.907	70.8646	T8-Drew Point&T9	North Slope	Alaska	103.393	2	37	70	33	MP	Kanevskiy, M. et al., 2020a
523	-152.966	70.5686	T10-East Teshekpuk	North Slope	Alaska	103.587	1	30	105	75	M	Kanevskiy, M. et al., 2020a
524	-153.153	70.2628	I1-Pik dunes-peat	North Slope	Alaska	69.5278	1	74	101	27	MP	Kanevskiy, M. et al., 2020a
526	-153.646	70.167	I4-CHRONO-SS-Pingo	North Slope	Alaska	50.135	1	67	91	24	M	Kanevskiy, M. et al., 2020a
527	-153.023	69.9451	I5-CHRONO-SS-7	North Slope	Alaska	99.3541	1	40	76	36	MP	Kanevskiy, M. et al., 2020a
528	-153.272	69.9884	I6-CHRONO-SS-8	North Slope	Alaska	20.085	1	96	116	20	M	Kanevskiy, M. et al., 2020a
529	-153.826	69.5812	I7-CHRONO-LB-7A	North Slope	Alaska	102.134	1	65	203	138	M	Kanevskiy, M. et al., 2020a
530	-153.849	69.5757	I8-CHRONO-LB-7B	North Slope	Alaska	232.867	1	28	143	115	P	Kanevskiy, M. et al., 2020a
531	-153.094	69.9897	I9-Inigok	North Slope	Alaska	21.2833	1	70	97	27	M	Kanevskiy, M. et al., 2020a
532	-156.225	70.0011	O1-CHRONO-LB-Camp	North Slope	Alaska	144.997	1	52	125	73	MP	Kanevskiy, M. et al., 2020a
533	-156.276	70.0023	O2-CHRONO-LB	North Slope	Alaska	104.932	1	65	123	58	M	Kanevskiy, M. et al., 2020a
534	-156.246	69.9979	O3-CHRONO-LB	North Slope	Alaska	134.282	1	54	140	86	MP	Kanevskiy, M. et al., 2020a
535	-156.258	69.996	O4-CHRONO-LB	North Slope	Alaska	143.344	1	52	105	53	MP	Kanevskiy, M. et al., 2020a
536	-157.081	70.0368	A1-Piksiksak	North Slope	Alaska	111.947	1	27	112	85	MP	Kanevskiy, M. et al., 2020a
591	-143.605	69.747	C43-MSI	Jago River	Alaska	98.55	1	70	242	172	MP	Kanevskiy, M. et al., 2020b
594	-147.731	64.871	Creamer's Field transect	Fairbanks	Alaska	192.23	9	50	420	370	P	Kanevskiy, M. et al., 2015
596	-147.03	64.7648	YMA2	Horseshoe Lake	Alaska	47.3879	1	65	323	258	M	Kanevskiy, M. and Jorgenson, M. T. 2015
597	-147.077	64.759	HL-T1 290&345	Horseshoe Lake	Alaska	30.8187	2	130	287	157	M	Kanevskiy, M. and Jorgenson, M. T. 2015
598	-147.053	64.7642	HL-T2 274	Horseshoe Lake	Alaska	38.1786	1	95	442	347	M	Kanevskiy, M. and Jorgenson, M. T. 2015
599	-147.045	64.7598	HL-YH1	Horseshoe Lake	Alaska	43.3277	1	435	510	75	M	Kanevskiy, M. and Jorgenson, M. T. 2015
607	-133.762	68.5379	NTGS2&3	Inuvik-Tuktoyaktuk	Canada	64.7911	2	100	600	500	M	Ensom, T. et al., 2020
609	-133.542	68.7494	NTGS4	Inuvik-Tuktoyaktuk	Canada	369.436	1	90	540	450	P	Ensom, T. et al., 2020
610	-133.541	68.7521	NTGS5	Inuvik-Tuktoyaktuk	Canada	89.9228	1	90	550	460	M	Ensom, T. et al., 2020
611	-133.545	68.7591	NTGS6	Inuvik-Tuktoyaktuk	Canada	42.935	1	94	550	456	MP	Ensom, T. et al., 2020
612	-133.275	69.0188	NTGS7	Inuvik-Tuktoyaktuk	Canada	57.3936	1	100	600	500	M	Ensom, T. et al., 2020
613	-133.271	69.0126	NTGS8	Inuvik-Tuktoyaktuk	Canada	159.375	1	100	600	500	P	Ensom, T. et al., 2020
614	-133.307	69.0129	NTGS9	Inuvik-Tuktoyaktuk	Canada	324.982	1	100	600	500	P	Ensom, T. et al., 2020
615	-132.935	69.2705	NTGS10	Inuvik-Tuktoyaktuk	Canada	378.608	1	180	600	420	M	Ensom, T. et al., 2020
616	-132.942	69.2682	NTGS12	Inuvik-Tuktoyaktuk	Canada	38.1359	1	100	575	475	M	Ensom, T. et al., 2020
617	-133.281	69.0144	NTGS17	Inuvik-Tuktoyaktuk	Canada	810.823	1	100	600	500	M	Ensom, T. et al., 2020
620	-110.142	64.5661	INAC-4	Lac de Gras	Canada	10.315	1	320	502	182	M	Wolfe, S. A. et al., 1997
621	-110.155	64.5704	INAC-6&7&8	Lac de Gras	Canada	15.2247	3	76	549	473	M	Wolfe, S. A. et al., 1997
624	-111.471	66.0148	INAC-9	Contwoyto Lake	Canada	26.6385	1	312	625	313	M	Wolfe, S. A. et al., 1997
625	-111.466	66.0275	96BGC-03	Contwoyto Lake	Canada	26.5	1	300	500	200	M	Wolfe, S. A. 1998
626	-116.314	62.0289	HWY3-UB-1A		Canada	67.0479	1	70	143	73	M	Holloway, J. 2020
628	-147.621	64.909	Shallow core		Alaska	35.44	1	90	303	213	M	Oliver, L. K. 2012
629	-162.423	66.7299	BAL16-B3	Baldwin Peninsula	Alaska	200	1	85	200	115	M	Jongejans, L. L. et al., 2018
630	-162.502	66.7365	BAL16-B4	Baldwin Peninsula	Alaska	65.5006	1	120	618	498	M	Jongejans, L. L. et al., 2018
631	-162.457	66.7306	BAL16-B5	Baldwin Peninsula	Alaska	166.667	1	65	99	34	M	Jongejans, L. L. et al., 2018
632	-153.852	70.7255	PG-TES15-T1-1&2	North Slope	Alaska	533.969	2	27	169	142	P	Fuchs, M et al., 2018
634	-153.849	70.729	PG-TES15-T1-3&4&5&34	North Slope	Alaska	148.11	4	30	215	185	MP	Fuchs, M et al., 2018
637	-153.845	70.7342	PG-TES15-T1-6	North Slope	Alaska	63.2	1	26	165	139	M	Fuchs, M et al., 2018
639	-153.928	70.7388	PG-TES15-T3-1	North Slope	Alaska	144.156	1	32	205	173	M	Fuchs, M et al., 2018
640	-153.921	70.738	PG-TES15-T3-2	North Slope	Alaska	211.183	1	34	130	96	P	Fuchs, M et al., 2018
641	-153.912	70.7372	PG-TES15-T3-3	North Slope	Alaska	73.54	1	35	195	160	M	Fuchs, M et al., 2018
642	-153.897	70.7357	PG-TES15-T3-5	North Slope	Alaska	110.183	1	35	190	155	M	Fuchs, M et al., 2018
643	-153.889	70.7349	PG-TES15-T3-6	North Slope	Alaska	187.4	1	25	195	170	MP	Fuchs, M et al., 2018
656	-138.957	69.5796	PG2150&PF2151	Herschel Island	Canada	72.2805	2	15	235	220	M	Tanski, G. et al., 2016
658	-139.026	69.5715	PG2152&PG2154	Herschel Island	Canada	47.4144	2	25	59	34	M	Tanski, G. et al., 2016
660	-139.007	69.5747	PG2155	Herschel Island	Canada	58.8556	1	45	197	152	M	Tanski, G. et al., 2016
661	-138.895	69.5708	PG2156	Herschel Island	Canada	49.92	1	50	220	170	M	Tanski, G. et al., 2016
662	-138.89	69.5718	PG2157	Herschel Island	Canada	35.0167	1	80	190	110	M	Tanski, G. et al., 2016
663	-138.997	69.5734	PG2159	Herschel Island	Canada	54.99	1	30	200	170	M	Tanski, G. et al., 2016
664	-138.871	69.5787	PG2163	Herschel Island	Canada	65.4	1	40	225	185	M	Tanski, G. et al., 2016
671	161.384	68.748	Shuchi Lake Ridge	Kolyma R Lowlands	Russia	27.3333	1	60	100	40	M	Heslop, J. K. et al., 2017
672	159.154	68.63	Duvyanni Yar	Kolyma R Lowlands	Russia	42.3	1	35	215	180	M	Heslop, J. K. et al., 2017
673	161.407	68.897	Tube Dispenser Lake	Kolyma R Lowlands	Russia	32	1	70	120	50	M	Heslop, J. K. et al., 2017
674	161.588	68.724	Rodinka	Kolyma R Lowlands	Russia	35	1	110	190	80	M	Heslop, J. K. et al., 2017
675	-75.7546	62.1031	D1_T1	Salluit	Canada	289.49	1	41	255	214	P	Gagnon, S. and Allard, M. 2020
676	-75.7536	62.1113	D4_T1	Salluit	Canada	67.4865	1	48	183	135	P	Gagnon, S. and Allard, M. 2020
677	-75.7654	62.1218	D5_T1	Salluit	Canada	523.482	1	34	144	110	P	Gagnon, S. and Allard, M. 2020
681	72.8843	65.2985	borehole 1-09	Nadym	Russia	20.075	1	300	500	200	M	Kukkonen, I. T. et al., 2020
682	72.8691	65.316	borehole 3-09	Nadym	Russia	16.825	1	300	500	200	M	Kukkonen, I. T. et al., 2020
686	100.916	37.9978	EB	Qilian mnts.	China	85.1321	1	100	600	500	P	Wang, Q. et al., 2017
687	66.8334	69.7093	36&43&44	Marre Sale	Russia	21.8333	3	100	200	100	M	Oblogov, G. E. et al., 2020
688	66.8143	69.7162	1-4,6	Marre Sale	Russia	32.6	5	100	200	100	M	Oblogov, G. E. et al., 2020
689	132.084	71.3836	PETA-CARB_ID8a-c	Buor Khaya	Russia	40.4944	5	60	550	490	M	Strauss, J. et al., 2020
691	-152.327	69.3038	PETA-CARB_ID22	Colville R.	Alaska	46.521	1	100	560	460	M	Strauss, J. et al., 2020
692	-150.516	69.3404	PETA-CARB_ID23	Itkillik River	Alaska	42.2017	1	50	540	490	M	Strauss, J. et al., 2020
693	-155.436	69.0326	PETA-CARB_ID20	Colville R.	Alaska	42.72	1	350	450	100	M	Strauss, J. et al., 2020
694	-152.853	69.2469	PETA-CARB_ID21	Colville R.	Alaska	44.0614	1	230	360	130	M	Strauss, J. et al., 2020
695	-147.756	65.0687	PETA-CARB_ID25	Vault Creek	Alaska	37.3335	1	282	382	100	M	Strauss, J. et al., 2020
704	-135.725	67.176	CB		Canada	151.356	1	115	305	190	M	Fontaine, M. 2016
705	-133.671	67.852	Lynx 2		Canada	31.6228	1	136	202	66	M	Fontaine, M. 2016
706	-133.754	68.384	NRD		Canada	154.882	1	136	170	34	M	Fontaine, M. 2016
707	-133.648	67.866	R2T2&3		Canada	33.5165	2	116	223	107	M	Fontaine, M. 2016
708	-135.288	67.464	Wilson		Canada	85.1138	1	175	265	90	M	Fontaine, M. 2016
711	171.657	65.525	Borehole 2020-04	Chukotka	Russia	90.625	1	80	880	800	M	Maslakov, A. A. et al., 2020
712	160.537	55.8909	Borehole 1-06	Kamchatka	Russia	37.857	1	50	530	480	M	Abramov, A. et al., 2008
713	160.28	55.739	Borehole 7-03	Kamchatka	Russia	35.833	1	190	630	440	M	Abramov, A. et al., 2008
714	160.277	55.742	Borehole 7-02	Kamchatka	Russia	43.857	1	180	680	500	M	Abramov, A. et al., 2008
715	160.584	55.931	Borehole 10-04	Kamchatka	Russia	32	1	160	650	490	M	Abramov, A. et al., 2008
716	160.29	55.7507	Borehole 8-03(06)	Kamchatka	Russia	45.857	1	70	570	500	M	Abramov, A. et al., 2008
718	-79.958	73.158	Gully	Bylot I.	Canada	110	1	40	180	140	MP	Fortier, D. et al., 2007
722	98.6988	35.0653	Huashixia		China	75.0312	1	120	760	640	M	Li, D. et al., 2008
724	70.079	73.334	Belyi Island	Belyi Island	Russia	39.6571	2	60	560	500	M	Slagoda, E. A. et al., 2013
732	98.6564	49.4903	Sharga		Mongolia	14	1				M	Sharkhuu, A. et al., 2007
733	100.16	50.4333	Hatgal		Mongolia	9	1				M	Sharkhuu, A. et al., 2007
734	99.4231	51.4114	Tsagaan-Nuur		Mongolia	40	1				M	Sharkhuu, A. et al., 2007
735	100.034	49.7883	Burenkhan 1		Mongolia	4	1				M	Sharkhuu, A. et al., 2007
736	99.4975	51.1872	Darhad		Mongolia	30	1				M	Sharkhuu, A. et al., 2007
737	100.032	49.7847	Burenkhan 2		Mongolia	2	1				M	Sharkhuu, A. et al., 2007
738	100.758	51.02	Dalbay		Mongolia	20.7729	1				M	Sharkhuu, A. et al., 2007
739	100.827	51.2858	Turag		Mongolia	15.3403	1				M	Sharkhuu, A. et al., 2007
758	-138.384	64.6455	KM92		Canada	244.7	1	20	85	65	MP	Frappier, R. and Lacelle, D. 2021
759	-138.391	64.661	KM93		Canada	453.3	1	10	105	95	P	Frappier, R. and Lacelle, D. 2021
760	-138.397	64.682	KM95		Canada	282.9	1	15	105	90	MP	Frappier, R. and Lacelle, D. 2021
764	-69.372	77.4872	QAA2017-14		Greenland	17.6538	1	250	477	227	M	Ingeman-Nielsen, T. 2020
766	129.654	62.007	Borehole 21		Russia	37.28	1	400	800	400	MP	Syromyatnikov, I. I. and Kunitsky, V. V. 2019
768	-133.421	62.221	FARO_BH01	Yukon	Canada	1341	1	35	268	233	P	Benkert, B.E. et al., 2015a
770	-133.339	62.223	FARO_BH02	Yukon	Canada	98.8571	1	65	135	70	MP	Benkert, B.E. et al., 2015a
772	-133.381	62.226	FARO_BH04	Yukon	Canada	69.0298	1	45	213	168	M	Benkert, B.E. et al., 2015a
774	-133.409	62.1975	FARO_BH05	Yukon	Canada	415.812	1	57	264	207	P	Benkert, B.E. et al., 2015a
776	-132.438	61.9645	RR_BH02	Yukon	Canada	41.4272	1	200	714	514	M	Benkert, B.E. et al., 2015b
778	-139.846	67.571	BH Site 8	Yukon	Canada	44.4077	1	32	410	378	MP	Benkert, B.E. et al., 2016
780	-139.837	67.572	BH Site 9	Yukon	Canada	54.1888	1	32	443	411	MP	Benkert, B.E. et al., 2016
782	-139.828	67.576	BH Site 11	Yukon	Canada	108.601	1	34	493	459	MP	Benkert, B.E. et al., 2016
784	-139.847	67.574	BH Site 12 B	Yukon	Canada	51.9415	1	65	308	243	M	Benkert, B.E. et al., 2016
786	-139.824	67.5855	BH Site 16	Yukon	Canada	64.3483	1	47	225	178	M	Benkert, B.E. et al., 2016
788	-139.829	67.593	BH Site 17	Yukon	Canada	43.494	1	48	290	242	M	Benkert, B.E. et al., 2016
790	-139.917	67.55	BH Site 18	Yukon	Canada	80.187	1	34	510	476	MP	Benkert, B.E. et al., 2016
792	-138.976	61.354	Burwash 1	Kluane Lake	Canada	41.0976	1	65	147	82	MP	Benkert, B. et al., 2013
794	-138.938	61.3375	Copper Joe 2	Kluane Lake	Canada	32	1	78	123	45	M	Benkert, B. et al., 2013
796	-138.843	61.285	Wind farm 1	Kluane Lake	Canada	34.5036	1	110	265	155	M	Benkert, B. et al., 2013
798	-147.831	64.8525	CCHRC T3	Fairbanks	Alaska	90.1815	34	100	600	500	MP	Bjella, K. L. et al., 2020
800	7.81785	46.1401	Breithorn		The Alps	0	1				M	Kenner, R. et al., 2019
801	9.94314	46.7469	Fluela 0202		The Alps	0	1				M	Kenner, R. et al., 2019
802	7.27492	46.0966	Les Attelas		The Alps	0	1				M	Kenner, R. et al., 2019
803	8.61043	46.6013	Gemsstock		The Alps	0	1				M	Kenner, R. et al., 2019
804	7.0569	45.9099	Grépillon		The Alps	0	1				M	Kenner, R. et al., 2019
805	-75.643	62.198	FS-9	Quebec	Canada	48.4857	1	70	420	350	M	L'Hérault, E. 2009
807	-77.2867	60.0356	P10_F1&F5	Quebec	Canada	64.2342	2	105	385	280	M	L'Hérault E. et al., 2013
809	-77.2763	60.0349	P10_F3	Quebec	Canada	26.4444	1	55	225	170	M	L'Hérault E. et al., 2013
811	-78.1549	60.8207	A10_F4	Quebec	Canada	30.625	1	58	322	264	M	L'Hérault E. et al., 2013
813	-78.2081	60.7947	A11_F1	Quebec	Canada	35.0588	1	43	385	342	M	L'Hérault E. et al., 2013
815	-78.1884	60.8078	A10_F8	Quebec	Canada	23.5455	1	65	215	150	M	L'Hérault E. et al., 2013
817	-70.0424	60.027	K11-F1	Quebec	Canada	47.6842	1	45	238	193	MP	L'Hérault E. et al., 2013
819	-69.9309	58.6943	T11-F3	Quebec	Canada	22.2778	1	64	409	345	M	L'Hérault E. et al., 2013
821	-163.216	61.2575	72B1	Yukon-Kuskokwim delta	Alaska	98.9835	1	65	129.8	64.8	P	Ludwig, S. et al., 2018
823	-163.361	61.292	72B3	Yukon-Kuskokwim delta	Alaska	806.83	1	65	115	50	P	Ludwig, S. et al., 2018
825	-163.247	61.2585	U1	Yukon-Kuskokwim delta	Alaska	444.064	1	65	125	60	P	Ludwig, S. et al., 2018
827	-163.237	61.2705	U3	Yukon-Kuskokwim delta	Alaska	304.701	1	65	118.7	53.7	P	Ludwig, S. et al., 2018
